# Identification of novel therapeutic targets for polyglutamine toxicity disorders that target mitochondrial fragmentation

Annika Traa<sup>1,2\*</sup>, Emily Machiela<sup>3\*</sup>, Paige D. Rudich<sup>1,2</sup>, Sonja K. Soo<sup>1,2</sup>, Megan M. Senchuk<sup>3</sup>,  
Jeremy M. Van Raamsdonk<sup>1,2,3,4,5</sup>

<sup>1</sup>Department of Neurology and Neurosurgery, McGill University, Montreal, Quebec, H4A 3J1, Canada

<sup>2</sup>Metabolic Disorders and Complications Program, and Brain Repair and Integrative Neuroscience Program, Research Institute of the McGill University Health Centre, Montreal, Quebec, H4A 3J1, Canada

<sup>3</sup>Laboratory of Aging and Neurodegenerative Disease, Center for Neurodegenerative Science, Van Andel Research Institute, Grand Rapids MI 49503, USA

<sup>4</sup>Division of Experimental Medicine, Department of Medicine, McGill University, Montreal, Quebec, Canada

<sup>5</sup>Department of Genetics, Harvard Medical School, Boston MA 02115, USA

\*these authors contributed equally to this work

**Short title:** Mitochondrial dynamics and polyglutamine toxicity

## Corresponding author:

Jeremy M. Van Raamsdonk

Department of Neurology and Neurosurgery, McGill University

MeDiC and BRaIN Programs, McGill University Health Centre

1001 Decarie Boulevard, Montreal, Quebec, H4A 3J1

514-934-1934 ext. 76157

[jeremy.vanraamsdonk@mcgill.ca](mailto:jeremy.vanraamsdonk@mcgill.ca)

ORCID iD: 0000-0001-8376-9605

1 **Abstract**

2 Huntington's disease (HD) is one of at least nine polyglutamine toxicity disorders caused by a  
3 trinucleotide CAG repeat expansion, all of which lead to age-onset neurodegeneration.

4 Mitochondrial dynamics and function are disrupted in HD and other polyglutamine toxicity  
5 disorders. While multiple studies have found beneficial effects from decreasing mitochondrial  
6 fragmentation in HD models by disrupting the mitochondrial fission protein DRP1, disrupting  
7 DRP1 can also have detrimental consequences in wild-type animals and HD models. In this  
8 work, we examine the effect of decreasing mitochondrial fragmentation in a neuronal *C.*

9 *elegans* model of polyglutamine toxicity called Neur-67Q. We find that Neur-67Q worms have  
10 deficits in mitochondrial morphology in GABAergic neurons and decreased mitochondrial  
11 function. Disruption of *drp-1* eliminates differences in mitochondrial morphology and rescues  
12 deficits in both movement and longevity in Neur-67Q worms. In testing twenty-four RNA  
13 interference (RNAi) clones that decrease mitochondrial fragmentation, we identified eleven  
14 clones that increase movement and extend lifespan in Neur-67Q worms. Overall, we show that  
15 decreasing mitochondrial fragmentation may be an effective approach to treat polyglutamine  
16 toxicity disorders and identify multiple novel genetic targets that circumvent the potential  
17 negative side effects of disrupting the primary mitochondrial fission gene *drp-1*.

18

19 **Keywords:** *C. elegans*; Huntington's disease; mitochondria; mitochondrial dynamics;  
20 polyglutamine toxicity disorder

21 **Significance Statement**

22 Polyglutamine toxicity disorders are caused by a trinucleotide CAG repeat expansion that leads  
23 to neurodegeneration. Both mitochondrial dynamics and function are disrupted in these  
24 disorders. In this work we use a simple genetic model organism, the worm *C. elegans*, to define  
25 the role of mitochondrial morphology in polyglutamine toxicity disorders. We show that CAG  
26 repeat expansion is sufficient to disrupt mitochondrial morphology and that genetic strategies  
27 that decrease mitochondrial fragmentation are beneficial in a neuronal model of polyglutamine  
28 toxicity. This work identifies multiple novel genes that are protective in worm models of  
29 polyglutamine toxicity, which may serve as potential therapeutic targets for Huntington's  
30 disease and other polyglutamine toxicity disorders.

## 30 Introduction

31 Huntington's disease (HD) is an adult-onset neurodegenerative disease caused by a  
32 trinucleotide CAG repeat expansion in the first exon of the *HTT* gene. The resulting expansion of  
33 the polyglutamine tract in the huntingtin protein causes a toxic gain of function that  
34 contributes to disease pathogenesis. HD is the most common of at least nine polyglutamine  
35 toxicity disorders including spinal and bulbar muscular atrophy (SBMA), dentatorubral-  
36 pallidoluysian atrophy (DRPLA), and spinocerebellar ataxia types 1, 2, 3, 6, 7 and 17 (SCA1,  
37 SCA2, SCA3, SCA6, SCA7, SCA17) <sup>1,2</sup>. Each disease occurs due to an expansion of a CAG repeat  
38 above a specific threshold number of repeats. The minimum number of disease-causing CAG  
39 repeats range from 21 CAG repeats (SCA6) to 55 CAG repeats (SCA3). These disorders are all  
40 unique neurodegenerative diseases that typically present in mid-life, but can present earlier in  
41 life with larger CAG repeat expansions <sup>3,4</sup>. The genes responsible for these disorders appear to  
42 be unrelated except for the presence of the CAG repeat sequence, indicating that CAG repeat  
43 expansion, independent of the genetic context, is likely sufficient to cause disease.

44  
45 Multiple lines of evidence suggest a role for mitochondrial dysfunction in the pathogenesis of  
46 polyglutamine toxicity disorders <sup>5,6</sup>. Both HD patients and animal models of the disease display  
47 several signs of mitochondrial dysfunction including decreased activity in the complexes of the  
48 mitochondrial electron transport chain <sup>7</sup>, increased lactate production in the brain <sup>8</sup>, decreased  
49 levels of ATP production <sup>9</sup>, lowered mitochondrial membrane potentials <sup>10</sup>, and impaired  
50 mitochondrial trafficking <sup>11</sup>. While less well studied than HD, other polyglutamine toxicity  
51 disorders also have evidence of mitochondrial deficits <sup>12-15</sup>.

52  
53 Mitochondrial fragmentation is a consistent feature of HD as it occurs in HD cell lines, HD worm  
54 models, HD mouse models and cells derived from HD patients <sup>16-23</sup>. Mitochondrial  
55 fragmentation has also been observed in models of other polyglutamine toxicity disorders,  
56 including SCA3, SCA7, and SBMA <sup>24-26</sup>. This suggests that CAG repeat expansion may be  
57 sufficient to cause mitochondrial fragmentation.

58

59 In order to decrease HD-associated mitochondrial fragmentation, multiple groups have  
60 targeted the mitochondrial fission protein DRP1 in models of HD. While disruption of DRP1  
61 typically has beneficial effects in HD models<sup>16,17,19</sup>, it has also been found to exacerbate disease  
62 phenotypes<sup>23</sup>. The difference in effect may be due to the level of DRP1 disruption, as deletion  
63 of *drp-1* was detrimental in an HD model while RNAi knockdown of *drp-1* in the same model  
64 had mixed effects<sup>23</sup>. Decreasing DRP1 levels can also be detrimental in a wild-type background  
65<sup>23,27-32</sup>. Thus, reducing mitochondrial fragmentation through other genetic targets may be a  
66 more ideal therapeutic strategy for HD and other polyglutamine toxicity disorders than  
67 disrupting DRP1.

68

69 In this work, we show that CAG repeat expansion is sufficient to disrupt mitochondrial  
70 morphology and function in a neuronal model of polyglutamine toxicity. The neuronal model of  
71 polyglutamine toxicity also displays deficits in movement and lifespan, which are ameliorated  
72 by deletion of *drp-1*. Using this model, we performed a targeted RNAi screen and identified  
73 eleven novel genetic targets that improve movement and increase lifespan. Overall, this work  
74 demonstrates that decreasing mitochondrial fragmentation may be an effective therapeutic  
75 strategy for polyglutamine toxicity disorders and identifies multiple potential genetic  
76 therapeutic targets for these disorders.

## 77 **Materials and Methods**

78

### 79 **Strains**

80 N2 (WT)

81 AM102 *rmls111[rgef-1p::40Q:YFP]* referred to as Neur-40Q

82 AM717 *rmls284[rgef-1p::67Q:YFP]* referred to as Neur-67Q

83 JVR258 *drp-1(tm1108);rmls284[rgef-1p::67Q:YFP]*

84 JVR438 *rmls284[rgef-1p::67Q:YFP]; sid-1(pk3321); uls69 [pCFJ90 (myo-2p::mCherry) + unc-*  
85 *119p::sid-1]*

86 JVR443 *rmls284[rgef-1p::67Q:YFP]; uls69 [pCFJ90 (myo-2p::mCherry) + unc-119p::sid-1]*

87 PHX3820 *sybls3820[rab-3p::tomm-20::mScarlet]* referred to as mito-mScarlet

88 JVR611 *rmls284[rgef-1p::67Q:YFP]; drp-1(tm1108); sybls3820[rab-3p::tomm-20::mScarlet]*

89 referred to as Neur-67Q;*drp-1*;mito-mScarlet

90 JVR612 *rmls284[rgef-1p::67Q:YFP]; sybls3820[rab-3p::tomm-20::mScarlet]* referred to as Neur-  
91 67Q;mito-mScarlet

92 JVR613 *drp-1(tm1108); sybls3820[rab-3p::tomm-20::mScarlet]* referred to as *drp-1*;mito-  
93 mScarlet

94 MQ1753 *drp-1 (tm1108)*

95 TU3401 *sid-1(pk3321); uls69 [pCFJ90 (myo-2p::mCherry) + unc-119p::sid-1]*

96 Strains were maintained at 20°C on NGM plates seeded with OP50 bacteria. The Neur-67Q  
97 model of HD is an integrated line that has been well characterized previously<sup>33</sup>. All crosses  
98 were confirmed by genotyping using PCR for deletion mutations, sequencing for point  
99 mutations and confirmation of fluorescence for fluorescent transgenes.

100

### 101 **Generation of strains to monitor mitochondrial morphology in GABA neurons**

102 The *rab-3p::tomm-20::mScarlet* strain was generated by SunyBiotech Co. Ltd. The 1208 bp *rab-*  
103 *3* promoter sequence (Addgene Plasmid #110880) was inserted directly upstream of the N-  
104 terminal TOMM-20 coding region. The first 47 amino acids of TOMM-20 were connected  
105 through a flexible linker (3xGGGGs) to the N-terminal of wrmScarlet<sup>34</sup>. The strain was

106 generated through microinjection of *rab-3p::tomm-20::mScarlet* in the pS1190 plasmid (20  
107 ng/ $\mu$ l) into wild-type N2 worms. The transgenic strain was integrated by  $\gamma$ -irradiation and the  
108 outcrossed 5X to remove background mutations.

109

### 110 **Confocal imaging and quantification**

111 Mitochondrial morphology was imaged and quantified using worms that express  
112 mitochondrially-targeted mScarlet specifically in neurons (*rab-3p::tomm-20::mScarlet*). Worms  
113 at day 1 or day 7 of adulthood were mounted on 2% agar pads and immobilized using 10  $\mu$ M  
114 levamisole. Worms were imaged under a 63x objective lens on a Zeiss LSM 780 confocal  
115 microscope. All conditions were kept the same for all images. Single plane images were  
116 collected for a total of 25 young adult worms over 3 biological replicates for each strain.  
117 Quantification of mitochondrial morphology was performed using ImageJ. Segmentation  
118 analysis was done using the SQUASSH (segmentation and quantification of subcellular shapes)  
119 plugin. Particle analysis was then used to quantify number of mitochondria, mitochondrial area,  
120 axonal mitochondrial load, mitochondrial circularity and maximum Feret's diameter (an  
121 indicator of particle length). Axonal load was calculated as the total mitochondrial area ( $\mu\text{m}^2$ ) in  
122 a region of interest (ROI), per length ( $\mu\text{m}$ ) of axon in the ROI. For representative images,  
123 mScarlet and YFP channels were merged. We observed some bleed-through of YFP into the red  
124 channel for strains expressing the 67Q-YFP transgene. Particles that showed up in the mScarlet  
125 images as a result of YFP bleed-through were manually excluded from morphology  
126 quantification based on the numbered particle mask output from the ImageJ particle analyzer.

127

### 128 **Oxygen consumption**

129 To measure basal oxygen consumption, a Seahorse XF<sub>e</sub>96 analyzer (Seahorse bioscience Inc.,  
130 North Billerica, MA, USA)<sup>35</sup> was used. Adult day 1 worms were washed in M9 buffer (22 mM  
131 KH<sub>2</sub>PO<sub>4</sub>, 34 mM NA<sub>2</sub>HPO<sub>4</sub>, 86 mM NaCl, 1 mM MgSO<sub>4</sub>) and pipetted in calibrant (~50 worms per  
132 well) into a Seahorse 96-well plate. Oxygen consumption rate was measured six times. One day  
133 before the assay, well probes were hydrated in 175  $\mu$ L of Seahorse calibrant solution overnight.  
134 The heating incubator was turned off to allow the Seahorse machine to reach room

135 temperature before placing worms inside. Rates of respiration were normalized to the number  
136 of worms per well. Plate readings were within 20 minutes of introducing the worms into the  
137 well and normalized relative to the number of worms per well.

138

### 139 **ATP production**

140 To measure ATP production, a luminescence-based ATP kit was used <sup>36</sup>. Approximately 200 age-  
141 synchronized worms were collected in deionized water before being washed and freeze-  
142 thawed three times. A Bioruptor (Diagenode) was used to sonicate the worm pellet for 30  
143 cycles of alternating 30 seconds on and 30 seconds off. The pellet was boiled for 15 minutes to  
144 release ATP. The pellet was then centrifuged at  $11,000 \times g$  for 10 minutes at 4°C and the  
145 resulting supernatant was collected. A Molecular Probes ATP determination Kit (Life  
146 Technologies) was used to measure ATP. Luminescence was normalized to protein levels  
147 determined by a Pierce BCA protein determination kit (Thermo Scientific).

148

### 149 **Rate of movement**

150 To measure rate of movement, thrashing rate in liquid was assessed using video-tracking and  
151 computer analysis <sup>37</sup>. Approximately 50 day 1 adult worms were placed in M9 buffer on an  
152 unseeded NGM plate. An Allied Vision Tech Stingray F-145 B Firewire Camera (Allied Vision,  
153 Exton, PA, USA) was used to capture videos at 1024×768 resolution and 8-bit using the MATLAB  
154 image acquisition toolbox. The wrMTrck plugin for ImageJ (<http://www.phage.dk/plugins>) was  
155 used to analyze rate of movement.

156

### 157 **Lifespan**

158 To measure lifespan, worms were placed on nematode growth media (NGM) agar plates  
159 containing 25 μM 5-fluoro-2'-deoxyuridine (FUdR). FUdR was used to reduce the progeny  
160 development. At 25 μM concentration of FUdR, progeny development into adulthood is not  
161 completely prevented in the first generation so animals were transferred to fresh plates after 4  
162 days <sup>38</sup>. Worms were moved to fresh plates weekly and survival was observed by gentle



163 prodding every 2 days. Lifespan experiments were conducted with three replicates of 30 worms  
164 each.

165

### 166 **Brood size**

167 To determine brood size, individual young adult worms were placed onto agar plates and  
168 transferred every day to new plates until progeny production stopped. Plates of resulting  
169 progeny were quantified when adulthood was reached. Experiments were conducted with  
170 three replicates of 5 worms each.

171

### 172 **Post-embryonic development**

173 To measure post-embryonic development (PED), eggs were moved to agar plates and left to  
174 hatch for 3 hours. L1 worms that were newly hatched were transferred to a new plate. The PED  
175 time was considered the total time from hatching to the young adult stage. Experiments were  
176 conducted with three replicates of 20 animals each.

177

### 178 **Quantitative reverse-transcription PCR (qPCR)**

179 To quantify mRNA levels, pre-fertile young adult worms were harvested in Trizol as previously  
180 described<sup>39</sup>. Three biological replicates for N2, BW-40Q, and BW-Htt74Q worms were collected  
181 to quantify gene expression. A High-Capacity cDNA Reverse Transcription kit (Life  
182 Technologies/Invitrogen) was used to convert mRNA to cDNA. A FastStart Universal SYBR Green  
183 kit (Roche) in an AP Biosystems real-time PCR machine were used to perform qPCR<sup>40,41</sup>. Primer  
184 sequences used:

185 *yfp* (L-GACGACGGCAACTACAAGAC, R-TCCTTGAAGTCGATGCCCTT).

186

### 187 **RNAi**

188 To knockdown gene expression, sequence-verified RNAi clones were grown approximately 12  
189 hours in LB with 50 µg/ml carbenicillin. Bacteria cultures were 5x concentrated and seeded  
190 onto NGM plates containing 5 mM IPTG and 50 µg/ml carbenicillin. Plates were incubated at  
191 room temperature for 2 days to induce RNAi. For the L4 parental paradigm, in which RNAi

192 knockdown began in the parental generation, L4 worms were plated on RNAi plates for one day  
193 and then transferred to a new plate as gravid adults. After 24 hours, the worms were removed  
194 from the plates. The resulting progeny from these worms were analyzed. RNAi experiments  
195 were conducted at 20°C.

196

### 197 **Experimental Design and Statistical Analysis**

198 All experiments were performed with experimenters blinded to the genotype of the worms.  
199 Worms used for experiments were randomly selected from maintenance plates. A minimum of  
200 three biological replicates, in which independent population of worms tested on different days,  
201 were performed for each experiment. Automated computer analysis was performed in assays  
202 where possible to eliminate potential bias. Power calculations were not used to determine  
203 sample size for experiments since sample size used in *C. elegans* studies are typically larger than  
204 required for observing a difference that is statistically significant. Three biological replicates  
205 were used for measurements of mitochondrial morphology. At least six replicates of ~50 worms  
206 each were used for measurements of oxygen consumption. Three biological replicates of ~200  
207 worms each were used for ATP measurements. Three biological replicates of 60 mm plate of  
208 worms were used for mRNA measurements. At least three biological replicates of ~40 worms  
209 each were used for the thrashing assays. Three biological replicates of 30 worms each were  
210 used for lifespan assays. Six individual worms were used for measuring brood size. Three  
211 biological replicates of 25 worms each were used to measure post-embryonic development  
212 time. GraphPad Prism was used to perform statistical analysis. One-way, two-way or repeated  
213 measures ANOVA were used to determine statistically significant differences between groups  
214 with Dunnett's or Bonferroni's multiple comparisons test. For analysis of lifespan, Kaplan-Meier  
215 survival plot were graphed and the Log-rank test was used to determine significant differences  
216 between two groups. This study has no pre-specified primary endpoint. Sample size calculations  
217 were not performed.

218 **Results**

219

220 **Mitochondrial morphology and function are disrupted in a neuronal model of polyglutamine**  
221 **toxicity**

222 In order to study the effect of polyglutamine toxicity on mitochondrial dynamics in neurons, we  
223 utilized a well-characterized model that expresses a polyglutamine protein containing 67  
224 glutamines tagged with YFP under the pan-neuronal *rgef-1* promoter<sup>33</sup>. These worms will be  
225 referred to as Neur-67Q worms. To visualize mitochondrial morphology in GABAergic neurons,  
226 we generated a new strain expressing mScarlet fused with the N-terminus of TOMM-20  
227 (translocase of outer mitochondrial membrane 20), thus targeting the red fluorescent protein  
228 mScarlet to the mitochondria. These worms (*rab-3p::tommm-20::mScarlet*) will be referred to as  
229 mito-mScarlet worms. After crossing Neur-67Q worms to mito-mScarlet worms, we examined  
230 mitochondrial morphology in the dorsal nerve cord.

231

232 We found that Neur-67Q worms exhibit mitochondrial fragmentation (**Fig. S1A**). Compared to  
233 mito-mScarlet control worms, Neur-67Q; mito-mScarlet worms have a decreased number of  
234 mitochondria (**Fig. S1B**). Although mitochondrial area was not significantly affected by CAG  
235 repeat expansion (**Fig. S1C**), Neur-67Q worms exhibit a decreased axonal mitochondrial load  
236 (**Fig. S1D**), which is calculated as mitochondria area per length of axon. In addition, the shape of  
237 the mitochondria is affected as Neur-67Q; mito-mScarlet worms have more circular  
238 mitochondria (**Fig. S1E**) and a decreased maximum Feret's diameter of the mitochondria (**Fig.**  
239 **1E**), which is the maximum distance between two parallel tangents to the mitochondria.

240

241 To determine if the differences in mitochondrial morphology affect mitochondrial function, we  
242 measured the rate of oxidative phosphorylation (oxygen consumption) and energy production  
243 (ATP levels). We found that Neur-67Q worms have increased oxygen consumption (**Fig. S2A**)  
244 but decreased levels of ATP (**Fig. S2B**). This suggests that the mitochondria in Neur-67Q are less  
245 efficient than in wild-type worms, possibly due to mitochondrial uncoupling. Combined, these

246 results show the presence of a disease-length CAG repeat expansion is sufficient to disrupt  
247 mitochondrial morphology and function.

248

249 **Differences in mitochondrial morphology in neuronal model of polyglutamine toxicity are**  
250 **exacerbated with increasing age**

251 To determine the effect of age on mitochondrial dynamics in Neur-67Q worms, we imaged and  
252 quantified mitochondrial morphology in worms at day 7 of adulthood. As in young adult worms,  
253 adult day 7 Neur-67Q worms exhibit mitochondrial fragmentation and a decrease in axonal  
254 mitochondria, which is much greater than observed in day 1 adult worms (**Fig. 1A**).

255 Quantification of mitochondrial morphology revealed that day 7 Neur-67Q worms have  
256 decreased mitochondrial number (**Fig. 1B**), decreased mitochondrial area (**Fig. 1C**), decreased  
257 axonal mitochondrial load (**Fig. 1D**), increased mitochondrial circularity (**Fig. 1E**) and decreased  
258 Feret's diameter of the mitochondria (**Fig. 1F**). These results indicate that aged Neur-67Q  
259 worms have a highly disconnected mitochondrial network morphology. Furthermore, the  
260 percentage decreases in mitochondrial number (-27% day 1 versus -64% day 7), mitochondrial  
261 area (-10% day 1 versus -22% day 7) and axonal mitochondrial load (-35% day 1 versus -70% day  
262 7) were all much greater at day 7 than at day 1 indicating that the deficits in mitochondrial  
263 morphology in Neur-67Q worms worsen with age (**Fig. S3**).

264

265 **Disruption of mitochondrial fission is beneficial in a neuronal model of polyglutamine toxicity**

266 As disruption of *drp-1* has been shown to ameliorate phenotypic deficits in various models of  
267 HD, we examined whether disruption of *drp-1* would be beneficial in Neur-67Q worms. We  
268 found that deletion of *drp-1* significantly improved mobility (**Fig. 2A**) and increased lifespan  
269 (**Fig. 2B**) in Neur-67Q worms. While the *drp-1* deletion decreased fertility (**Fig. 2C**) and slowed  
270 development (**Fig. 2D**) in wild-type worms, it did not affect either of these phenotypes in Neur-  
271 67Q worms. Finally, we examined the effect of *drp-1* deletion on mitochondrial function in  
272 Neur-67Q worms. We found that the increased oxygen consumption observed in Neur-67Q  
273 worms is significantly decreased by disruption of *drp-1* (**Fig. 2E**). However, the *drp-1* deletion  
274 was unable to increase the low ATP levels in Neur-67Q worms, and decreased ATP levels in

275 wild-type worms (**Fig. 2F**). Although the effects of *drp-1* deletion in Neur-67Q worms are  
276 primarily beneficial, the loss of *drp-1* increased expression of the disease-length polyglutamine  
277 mRNA (**Fig. S4**), as we and others have previously observed<sup>16,23</sup>. Since increased levels of  
278 polyglutamine protein would cause more toxicity, the protective effects of *drp-1* deletion may  
279 be greater if polyglutamine mRNA levels were unaffected.

280

281 To ensure that the beneficial effects of the *drp-1* deletion in Neur-67Q worms are caused by the  
282 disruption of *drp-1*, we examined the effect of *drp-1* RNAi in Neur-67Q worms. Because most *C.*  
283 *elegans* neurons are resistant to RNAi knockdown<sup>42</sup>, we first crossed Neur-67Q worms to a  
284 worm strain that exhibits enhanced RNAi knockdown specifically in the neurons but is resistant  
285 to RNAi in other tissues<sup>43</sup>. In the resulting strain (Neur-67Q;*sid-1;unc-119p::sid-1*), RNAi is only  
286 active in the nervous system.

287

288 As with the *drp-1* deletion, knocking down *drp-1* expression throughout life increased the rate  
289 of movement (**Fig. S5A**) and increased lifespan (**Fig. S5B**) in Neur-67Q worms, while having no  
290 effect on fertility in Neur-67Q worms (**Fig. S5C**). As with the *drp-1* deletion, *drp-1* RNAi  
291 decreased both oxygen consumption and ATP levels in Neur-67Q worms (**Fig. S5D,E**).

292

### 293 **Disruption of mitochondrial fission decreases mitochondrial fragmentation in neurons**

294 Having shown that *drp-1* deletion ameliorates phenotypic deficits in Neur-67Q worms, we  
295 wondered whether the alterations in mitochondrial morphology were also corrected.

296 Accordingly, we imaged and quantified mitochondrial morphology in Neur-67Q;*drp-1* worms at  
297 day 1 (**Fig. S6**) and day 7 (**Fig. 3**) of adulthood. At day 1 of adulthood, disruption of *drp-1*  
298 markedly elongated the neuronal mitochondria leading to decreased mitochondrial  
299 fragmentation in both Neur-67Q worms and wild-type worms (**Fig. S6A**). Quantification of these  
300 differences revealed that deletion of *drp-1* results in significantly decreased numbers of  
301 mitochondria (**Fig. S6B**), significantly increased mitochondrial area (**Fig. S6C**), significantly  
302 increased axonal mitochondrial load (**Fig. S6D**), significantly decreased mitochondrial circularity  
303 (**Fig. S6E**) and significantly increased Feret's diameter (**Fig. S6F**).

304

305 The beneficial effects of *drp-1* disruption on mitochondrial morphology in Neur-67Q worms is  
306 also observed at day 7 of adulthood (**Fig. 3A**). In Neur-67Q worms, disruption of *drp-1* increases  
307 mitochondrial number (**Fig. 3B**), increases mitochondrial area (**Fig. 3C**), increases axonal  
308 mitochondrial load (**Fig. 3D**), decreases mitochondrial circularity (**Fig. 3E**), and increases the  
309 Feret's diameter of the mitochondria (**Fig. 3F**). Similar changes are observed in wild-type worms  
310 with the exception of mitochondrial number, which is significantly decreased by *drp-1*  
311 disruption (**Fig. 3B**).

312

313 Combined, these results indicate that *drp-1* has a beneficial effect on mitochondrial  
314 morphology in Neur-67Q worms. Interestingly, CAG repeat expansion in Neur-67Q worms has  
315 no effect on mitochondrial morphology in the *drp-1* mutant background (**Fig. S7**).

316

### 317 **Targeting genes that affect mitochondrial fragmentation improves thrashing rate and lifespan** 318 **in a neuronal model of polyglutamine toxicity**

319 While our results show that decreasing levels of *drp-1* are beneficial in a neuronal worm model  
320 of polyglutamine toxicity, this treatment had a detrimental effect in a *C. elegans* model of HD in  
321 which exon 1 of mutant huntingtin is expressed in the body wall muscle<sup>23</sup>. Moreover, a number  
322 of studies have found that disruption of DRP1 can be detrimental in organisms ranging from  
323 worms to humans<sup>27-32</sup>.

324

325 To circumvent potential detrimental effects of disrupting *drp-1*, we targeted other genes that  
326 have been previously found to decrease mitochondrial fragmentation<sup>44</sup>. In the previous study,  
327 a targeted RNAi screen identified 24 mitochondria-related RNAi clones that decrease  
328 mitochondrial fragmentation in the body wall muscle of *C. elegans*. We examined the effect of  
329 these 24 RNAi clones in neuron-specific RNAi Neur-67Q worms (Neur-67Q; *sid-1*; *unc-119p::sid-*  
330 *1*). Treatment with RNAi was begun at the L4 stage of the parental generation, and the rate of  
331 movement was assessed in the progeny (experimental generation).

332

333 We found that 16 of the 24 RNAi clones that decrease mitochondrial fragmentation significantly  
334 increased the rate of movement in the neuron-specific RNAi Neur-67Q model (**Fig. 4A**). To  
335 ensure that the improved movement in Neur-67Q worms did not result from a general effect  
336 of these RNAi clones on the rate of movement, we treated *sid-1;unc-119p::sid-1* control worms  
337 with the same panel of 24 RNAi clones and examined movement. Unlike the Neur-67Q worms,  
338 we found that only four of the RNAi clones improved movement in the neuron-specific RNAi  
339 strain (**Fig. 4B**). This indicates that for the majority of the RNAi clones that show a benefit, the  
340 improvement in movement is specific to the neuronal model of polyglutamine toxicity.

341

342 We next examined whether the genes that improved motility in neuron-specific RNAi Neur-67Q  
343 worms also improved longevity. We found that 11 of the 16 RNAi clones that increased the rate  
344 of movement also increased lifespan in neuron-specific RNAi Neur-67Q worms (**Fig. 5**). In  
345 contrast, only 3 of these RNAi clones increased lifespan in the neuron-specific RNAi control  
346 strain (**Fig. S8**). Overall, RNAi clones which decrease mitochondrial fragmentation in body wall  
347 muscle are beneficial in a neuronal model of polyglutamine toxicity. The corresponding target  
348 genes represent novel therapeutic targets for HD and other polyglutamine toxicity disorders.

349 **Discussion**

350

351 Since the discovery of the genes responsible for HD and other polyglutamine toxicity disorders  
352 <sup>45,46</sup>, multiple animal models of these disorders have been generated to gain insight into disease  
353 pathogenesis <sup>47,48</sup>. This includes *C. elegans* models of HD and polyglutamine toxicity <sup>33,49-51</sup>. *C.*  
354 *elegans* offers a number of advantages for studying neurodegenerative disease including being  
355 able to perform large scale screens for disease modifiers rapidly and cost effectively <sup>52,53</sup>. In  
356 addition, the interconnections of all of the neurons in *C. elegans* have been mapped. In terms of  
357 studying mitochondrial dynamics, the transparent nature of *C. elegans* facilitates imaging  
358 mitochondrial morphology in a live organism, which can then be correlated with whole  
359 organism phenotypes.

360

361 **CAG repeat expansion disrupts mitochondrial morphology and function in neurons**

362 HD and other polyglutamine toxicity disorders are neurodegenerative diseases in which the  
363 most severe pathology occurs in neurons. We previously examined mitochondrial  
364 fragmentation in a muscle model of HD as it is more experimentally accessible <sup>23</sup>. However, to  
365 gain greater physiological relevance, in this study, we generated novel strains to examine  
366 mitochondrial morphology in neurons. We found that CAG repeat expansion in Neur-67Q  
367 worms is sufficient to cause mitochondrial fragmentation neurons as well as a progressive  
368 decrease in the abundance of mitochondria in the axons of the dorsal nerve cord. The  
369 differences in mitochondrial number, axonal load, size, circularity and length (Feret's diameter)  
370 in the neuronal model of polyglutamine toxicity are quantifiable and highly significant.

371

372 Importantly, Neur-67Q worms also exhibited changes in mitochondrial function including a  
373 significant increase in oxygen consumption and a significant decrease in ATP levels. These  
374 differences are particularly striking given that oxygen consumption and ATP levels were  
375 measured in whole worms while the expanded polyglutamine transgene is only expressed in  
376 neurons, which make up 302 of the worm's 959 cells. Given the magnitude of the differences



377 observed, it is possible that changes occurring in the neurons are having cell-non-autonomous  
378 effects on mitochondrial function in other tissues.

379

380 Although the yield of ATP from oxidative phosphorylation is variable<sup>54</sup>, oxygen consumption  
381 and ATP production normally correlate under basal conditions due to the high dependence of  
382 ATP production on the electron transport chain in *C. elegans*<sup>55,56</sup>. The opposing changes in ATP  
383 and oxygen consumption suggest that the mitochondria in Neur-67Q worms are inefficient or  
384 damaged, leading to a marked decrease in ATP produced per amount of oxygen consumed. We  
385 observed a similar pattern in a mitophagy-defective worm model of Parkinson's disease in  
386 which there is a deletion of *pdr-1/PRKN*<sup>35</sup>.

387

### 388 **Tissue-specific effects of disrupting mitochondrial fission**

389 One of the most surprising findings of our current study is that deletion of *drp-1* has different  
390 effects in neuronal and body wall muscle models of polyglutamine toxicity (see **Table S1** for  
391 comparison). In the neuronal model, deletion of *drp-1* increases movement and lifespan and  
392 has no detrimental effect on development or fertility. In contrast, disruption of *drp-1* in the  
393 body wall muscle model decreases movement, lifespan, fertility and the rate of development<sup>23</sup>.  
394 The opposing effects of reducing *drp-1* on polyglutamine toxicity in neurons compared to body  
395 wall muscle suggest that the optimal balance between mitochondrial fission and fusion may  
396 differ between tissues. Alternatively, it is possible that the loss of mitochondrial fission is better  
397 tolerated in neurons than in body wall muscle, even though both tissues are post-mitotic.  
398 Finally, it could be that decreasing *drp-1* levels is beneficial in neurons because it is more  
399 effective at correcting disruptions in mitochondrial networks in that tissue (**Fig 3**) than in body  
400 wall muscle, where *drp-1* deletion had little or no effect on mitochondrial morphology<sup>23</sup>.

401

402 It should be noted that the neuronal model of polyglutamine toxicity used in this study and the  
403 HD muscle model that we utilized previously cannot be directly compared due to differences  
404 between these strains beyond the tissue of expression. Notably, BW-Htt-74Q worms have a  
405 small fragment of the huntingtin protein linked to the expanded polyglutamine tract, while

406 Neur-67Q only have the expanded polyglutamine tract. The size of the polyglutamine tract is  
407 different between these two strains, and BW-Htt-74Q worms have the polyglutamine tagged  
408 with GFP, while the polyglutamine is tagged with YFP in Neur-67Q worms. Thus, while our  
409 results do not rule out other factors contributing to the differences between the neuronal  
410 strain and the muscle strain, they clearly show that decreasing *drp-1* levels can be beneficial in  
411 worms expressing an expanded polyglutamine tract in neurons, and that decreasing *drp-1* levels  
412 can be detrimental in worms expressing an expanded polyglutamine tract in muscle cells.

413

#### 414 **Decreasing mitochondrial fragmentation as a therapeutic strategy for polyglutamine toxicity** 415 **disorders**

416 Due to the many roles *drp-1* plays in promoting proper cellular function through control of the  
417 mitochondria and the previously observed detrimental effects of decreasing *drp-1* in a body  
418 wall muscle model<sup>23</sup>, decreasing levels or activity of DRP-1 may be a non-ideal therapeutic  
419 target for HD or other polyglutamine toxicity disorders. Accordingly, we explored other possible  
420 genetic targets that decrease mitochondrial fragmentation. We performed a targeted RNAi  
421 screen using 24 RNAi clones previously found to decrease mitochondrial fragmentation in body  
422 wall muscle<sup>44</sup>. A high percentage of these RNAi clones increased movement (16 of 24 RNAi  
423 clones that decrease fragmentation) and lifespan (11 of 16 RNAi clones that improve  
424 movement) in Neur-67Q worms.

425

426 As we obtained numerous positive hits, we did not confirm knockdown by qPCR or confirm a  
427 decrease in mitochondrial fragmentation. Thus, we can't exclude the possibility that the  
428 remaining eight genes that failed to show a beneficial effect may have had either insufficient  
429 genetic knockdown or did not exhibit the predicted effect on mitochondrial morphology.  
430 Nonetheless, a high proportion of RNAi clones previously found to decrease mitochondrial  
431 fragmentation increased movement in the neuronal HD model indicating that multiple genetic  
432 approaches to decreasing mitochondrial fragmentation are beneficial in worm models of  
433 polyglutamine toxicity.

434

435 In order to prioritize therapeutic targets for further characterization and validation, we  
436 analyzed the results from the current study with our previous study of these RNAi clones in a  
437 body wall muscle model of HD<sup>23</sup> (**Table 1**). The genes were ranked by giving one point for  
438 improving either: thrashing rate in Neur-67Q worms; lifespan in Neur-67Q worms; crawling rate  
439 in BW-Htt74Q worms; or thrashing rate in BW-Htt74Q worms. Of the 24 RNAi clones tested in  
440 both models, 21 clones exhibited a beneficial effect on at least one phenotype. This indicates  
441 that multiple approaches to decreasing mitochondrial fragmentation can ameliorate deficits  
442 caused by CAG repeat expansion. The top-ranked therapeutic targets were *alh-12* and *pgp-3*,  
443 which resulted in improvement of all four assessments, and *gpd-4*, *immt-2*, *sdha-2* and *wht-1*,  
444 which resulted in improvement in three of the assessments (**Table 1**).

445  
446 *alh-12* encodes a cytoplasmic aldehyde dehydrogenase that is expressed in the intestine, body  
447 wall muscle and specific neurons. It is involved in multiple metabolic pathways including  
448 arginine metabolism, glycerolipid metabolism, glycolysis/gluconeogenesis and tryptophan  
449 degradation. As very little is known about the functions of ALH-12, it is hard to speculate how  
450 disrupting *alh-12* may be acting to improve movement and lifespan in the worm models of  
451 polyglutamine toxicity.

452  
453 *pgp-3* encodes a p-glycoprotein related protein. It is a transmembrane protein that transports  
454 molecules out of the cytoplasm. PGP-3 is primarily expressed in the intestine<sup>57</sup>, but has also  
455 been reported in other tissues. Disruption of *pgp-3* sensitizes worms to *P. aeruginosa* in a toxin-  
456 based fast kill assay<sup>58</sup> as well as exposure to colchicine and chloroquinone<sup>59</sup>, presumably by  
457 disrupting the active removal of the toxic compounds from cells. It is unclear how loss of a  
458 protective function against toxins and xenobiotics is protective against polyglutamine toxicity,  
459 but it may be through hormesis, the process by which exposure to a mild stress activates  
460 protective pathways that can increase resistance to subsequent stresses and extend longevity.

461 **Conclusions**

462 In this work, we show that a *C. elegans* neuronal model of polyglutamine toxicity exhibit deficits  
463 in mitochondrial morphology and function, which are associated with decreased movement  
464 and lifespan. Decreasing the levels of the mitochondrial fission gene *drp-1* through genetic  
465 deletion or RNAi increases both movement and lifespan in Neur-67Q worms. Similarly,  
466 treatment of Neur-67Q worms with RNAi clones that decrease mitochondrial fragmentation  
467 resulted in increased movement and lifespan. Overall, this work suggests that decreasing  
468 mitochondrial fragmentation may be beneficial in treating HD and other polyglutamine toxicity  
469 disorders and identifies alternative genetic targets that circumvent the negative effects of  
470 disrupting DRP-1. Future studies will be needed to further investigate the mechanisms by which  
471 the genes we identified are beneficial and to validate these targets in other models of HD.

472 **Author Contributions: Annika Traa:** Conceptualization, Methodology, Validation, Formal  
473 analysis, Investigation, Visualization, Writing – review and editing. **Emily Machiela:**  
474 Conceptualization, Methodology, Validation, Formal analysis, Investigation, Writing – original  
475 draft, Visualization, Writing – review and editing. **Paige Rudich:** Conceptualization,  
476 Methodology, Validation, Formal analysis, Investigation, Visualization, Writing – review and  
477 editing, Supervision. **Sonja Soo:** Methodology, Validation, Formal analysis, Investigation,  
478 Visualization, Writing – review and editing. **Megan Senchuk:** Writing – review and editing,  
479 Supervision. **Jeremy Van Raamsdonk:** Conceptualization, Methodology, Validation, Formal  
480 analysis, Investigation, Visualization, Writing – original draft, Writing – review and editing,  
481 Supervision.

482

483 **Conflict of Interests:** The authors declare no conflicting interests.

484

485 **Funding:** This work was supported by the Canadian Institutes of Health Research (CIHR;  
486 <http://www.cihr-irsc.gc.ca/>; JVR), the Natural Sciences and Engineering Research Council of  
487 Canada (NSERC; [https://www.nserc-crsng.gc.ca/index\\_eng.asp](https://www.nserc-crsng.gc.ca/index_eng.asp); JVR), the National Institute of  
488 General Medical Sciences (NIGMS; <https://www.nigms.nih.gov/>; JVR) by grant number R01  
489 GM121756 and the Van Andel Research Institute (VARI). JVR is the recipient of a Senior  
490 Research Scholar career award from the Fonds de Recherche du Québec Santé (FRQS) and  
491 Parkinson Quebec. AT received scholarships from NSERC and FRQS. SKS received a scholarship  
492 from FRQS. PDR received a fellowship award from FRQS. The funders had no role in study  
493 design, data collection and analysis, decision to publish, or preparation of the manuscript.

494

495 **Acknowledgements:** Some strains were provided by the *Caenorhabditis* Genetics Center (CGC),  
496 which is funded by the National Institutes of Health (NIH) Office of Research Infrastructure  
497 Programs (P40 OD010440). We would also like to acknowledge the *C. elegans* knockout  
498 consortium and the National Bioresource Project of Japan for providing strains used in this  
499 research.

## 500 References

501

- 502 1. Zoghbi HY, Orr HT. Glutamine repeats and neurodegeneration. *Annual review of*  
503 *neuroscience*. 2000;23:217-247.
- 504 2. Lieberman AP, Shakkottai VG, Albin RL. Polyglutamine Repeats in Neurodegenerative  
505 *Diseases*. *Annual review of pathology*. 2019;14:1-27.
- 506 3. Lee JM, Galkina EI, Levantovsky RM, et al. Dominant effects of the Huntington's disease  
507 HTT CAG repeat length are captured in gene-expression data sets by a continuous  
508 analysis mathematical modeling strategy. *Human molecular genetics*. 2013;22(16):3227-  
509 3238.
- 510 4. Lee JM, Ramos EM, Lee JH, et al. CAG repeat expansion in Huntington disease  
511 determines age at onset in a fully dominant fashion. *Neurology*. 2012;78(10):690-695.
- 512 5. Costa V, Scorrano L. Shaping the role of mitochondria in the pathogenesis of  
513 Huntington's disease. *EMBO J*. 2012;31(8):1853-1864.
- 514 6. Oliveira JM. Nature and cause of mitochondrial dysfunction in Huntington's disease:  
515 focusing on huntingtin and the striatum. *Journal of neurochemistry*. 2010;114(1):1-12.
- 516 7. Browne SE, Bowling AC, MacGarvey U, et al. Oxidative damage and metabolic  
517 dysfunction in Huntington's disease: selective vulnerability of the basal ganglia. *Annals*  
518 *of neurology*. 1997;41(5):646-653.
- 519 8. Jenkins BG, Koroshetz WJ, Beal MF, Rosen BR. Evidence for impairment of energy  
520 metabolism in vivo in Huntington's disease using localized <sup>1</sup>H NMR spectroscopy.  
521 *Neurology*. 1993;43(12):2689-2695.
- 522 9. Seong IS, Ivanova E, Lee JM, et al. HD CAG repeat implicates a dominant property of  
523 huntingtin in mitochondrial energy metabolism. *Human molecular genetics*.  
524 2005;14(19):2871-2880.
- 525 10. Panov AV, Gutekunst CA, Leavitt BR, et al. Early mitochondrial calcium defects in  
526 Huntington's disease are a direct effect of polyglutamines. *Nature neuroscience*.  
527 2002;5(8):731-736.
- 528 11. Trushina E, Dyer RB, Badger JD, 2nd, et al. Mutant huntingtin impairs axonal trafficking  
529 in mammalian neurons in vivo and in vitro. *Molecular and cellular biology*.  
530 2004;24(18):8195-8209.
- 531 12. Ferro A, Carbone E, Zhang J, et al. Short-term succinic acid treatment mitigates  
532 cerebellar mitochondrial OXPHOS dysfunction, neurodegeneration and ataxia in a  
533 Purkinje-specific spinocerebellar ataxia type 1 (SCA1) mouse model. *PLoS One*.  
534 2017;12(12):e0188425.
- 535 13. Kazachkova N, Raposo M, Montiel R, et al. Patterns of mitochondrial DNA damage in  
536 blood and brain tissues of a transgenic mouse model of Machado-Joseph disease.  
537 *Neuro-degenerative diseases*. 2013;11(4):206-214.
- 538 14. Giorgetti E, Yu Z, Chua JP, et al. Rescue of Metabolic Alterations in AR113Q Skeletal  
539 Muscle by Peripheral Androgen Receptor Gene Silencing. *Cell reports*. 2016;17(1):125-  
540 136.
- 541 15. Rocchi A, Milioto C, Parodi S, et al. Glycolytic-to-oxidative fiber-type switch and mTOR  
542 signaling activation are early-onset features of SBMA muscle modified by high-fat diet.  
543 *Acta neuropathologica*. 2016;132(1):127-144.

- 544 16. Wang H, Lim PJ, Karbowski M, Monteiro MJ. Effects of overexpression of huntingtin  
545 proteins on mitochondrial integrity. *Hum Mol Genet.* 2009;18(4):737-752.
- 546 17. Song W, Chen J, Petrilli A, et al. Mutant huntingtin binds the mitochondrial fission  
547 GTPase dynamin-related protein-1 and increases its enzymatic activity. *Nature medicine.*  
548 2011;17(3):377-382.
- 549 18. Haun F, Nakamura T, Shiu AD, et al. S-nitrosylation of dynamin-related protein 1  
550 mediates mutant huntingtin-induced mitochondrial fragmentation and neuronal injury  
551 in Huntington's disease. *Antioxidants & redox signaling.* 2013;19(11):1173-1184.
- 552 19. Guo X, Disatnik MH, Monbureau M, Shamloo M, Mochly-Rosen D, Qi X. Inhibition of  
553 mitochondrial fragmentation diminishes Huntington's disease-associated  
554 neurodegeneration. *The Journal of clinical investigation.* 2013;123(12):5371-5388.
- 555 20. Jin YN, Yu YV, Gundemir S, et al. Impaired mitochondrial dynamics and Nrf2 signaling  
556 contribute to compromised responses to oxidative stress in striatal cells expressing full-  
557 length mutant huntingtin. *PloS one.* 2013;8(3):e57932.
- 558 21. Joshi AU, Ebert AE, Haileselassie B, Mochly-Rosen D. Drp1/Fis1-mediated mitochondrial  
559 fragmentation leads to lysosomal dysfunction in cardiac models of Huntington's disease.  
560 *J Mol Cell Cardiol.* 2019;127:125-133.
- 561 22. Costa V, Giacomello M, Hudec R, et al. Mitochondrial fission and cristae disruption  
562 increase the response of cell models of Huntington's disease to apoptotic stimuli. *EMBO*  
563 *molecular medicine.* 2010;2(12):490-503.
- 564 23. Machiela E, Rudich PD, Traa A, et al. Targeting Mitochondrial Network Disorganization is  
565 Protective in *C. elegans* Models of Huntington's Disease. *Aging and disease.*  
566 2021;Epub:0-.
- 567 24. Borgia D, Malena A, Spinazzi M, et al. Increased mitophagy in the skeletal muscle of  
568 spinal and bulbar muscular atrophy patients. *Hum Mol Genet.* 2017;26(6):1087-1103.
- 569 25. Harmuth T, Prell-Schicker C, Weber JJ, et al. Mitochondrial Morphology, Function and  
570 Homeostasis Are Impaired by Expression of an N-terminal Calpain Cleavage Fragment of  
571 Ataxin-3. *Frontiers in molecular neuroscience.* 2018;11:368.
- 572 26. Ward JM, Stoyas CA, Switonski PM, et al. Metabolic and Organelle Morphology Defects  
573 in Mice and Human Patients Define Spinocerebellar Ataxia Type 7 as a Mitochondrial  
574 Disease. *Cell reports.* 2019;26(5):1189-1202 e1186.
- 575 27. Ishihara N, Nomura M, Jofuku A, et al. Mitochondrial fission factor Drp1 is essential for  
576 embryonic development and synapse formation in mice. *Nature cell biology.*  
577 2009;11(8):958-966.
- 578 28. Waterham HR, Koster J, van Roermund CW, Mooyer PA, Wanders RJ, Leonard JV. A  
579 lethal defect of mitochondrial and peroxisomal fission. *The New England journal of*  
580 *medicine.* 2007;356(17):1736-1741.
- 581 29. Wakabayashi J, Zhang Z, Wakabayashi N, et al. The dynamin-related GTPase Drp1 is  
582 required for embryonic and brain development in mice. *The Journal of cell biology.*  
583 2009;186(6):805-816.
- 584 30. Byrne JJ, Soh MS, Chandhok G, et al. Disruption of mitochondrial dynamics affects  
585 behaviour and lifespan in *Caenorhabditis elegans*. *Cell Mol Life Sci.* 2019;76(10):1967-  
586 1985.

- 587 31. Fahrner JA, Liu R, Perry MS, Klein J, Chan DC. A novel de novo dominant negative  
588 mutation in DNM1L impairs mitochondrial fission and presents as childhood epileptic  
589 encephalopathy. *Am J Med Genet A*. 2016;170(8):2002-2011.
- 590 32. Machiela E, Lontis T, Dues DJ, et al. Disruption of mitochondrial dynamics increases  
591 stress resistance through activation of multiple stress response pathways. *FASEB journal*  
592 : official publication of the Federation of American Societies for Experimental Biology.  
593 2020;34(6):8475-8492.
- 594 33. Brignull HR, Moore FE, Tang SJ, Morimoto RI. Polyglutamine proteins at the pathogenic  
595 threshold display neuron-specific aggregation in a pan-neuronal *Caenorhabditis elegans*  
596 model. *J Neurosci*. 2006;26(29):7597-7606.
- 597 34. El Mouridi S, Lecroisey C, Tardy P, et al. Reliable CRISPR/Cas9 Genome Engineering in  
598 *Caenorhabditis elegans* Using a Single Efficient sgRNA and an Easily Recognizable  
599 Phenotype. *G3*. 2017;7(5):1429-1437.
- 600 35. Cooper JF, Machiela E, Dues DJ, Spielbauer KK, Senchuk MM, Van Raamsdonk JM.  
601 Activation of the mitochondrial unfolded protein response promotes longevity and  
602 dopamine neuron survival in Parkinson's disease models. *Scientific reports*.  
603 2017;7(1):16441.
- 604 36. Wu Z, Senchuk MM, Dues DJ, et al. Mitochondrial unfolded protein response  
605 transcription factor ATFS-1 promotes longevity in a long-lived mitochondrial mutant  
606 through activation of stress response pathways. *BMC biology*. 2018;16(1):147.
- 607 37. Cooper JF, Dues DJ, Spielbauer KK, Machiela E, Senchuk MM, Van Raamsdonk JM.  
608 Delaying aging is neuroprotective in Parkinson's disease: a genetic analysis in *C. elegans*  
609 models. *NPJ Parkinson's disease*. 2015;1:15022.
- 610 38. Van Raamsdonk JM, Hekimi S. FUDR causes a twofold increase in the lifespan of the  
611 mitochondrial mutant gas-1. *Mech Ageing Dev*. 2011;132(10):519-521.
- 612 39. Schaar CE, Dues DJ, Spielbauer KK, et al. Mitochondrial and cytoplasmic ROS have  
613 opposing effects on lifespan. *PLoS Genet*. 2015;11(2):e1004972.
- 614 40. Machiela E, Dues DJ, Senchuk MM, Van Raamsdonk JM. Oxidative stress is increased in  
615 *C. elegans* models of Huntington's disease but does not contribute to polyglutamine  
616 toxicity phenotypes. *Neurobiology of disease*. 2016;96:1-11.
- 617 41. Senchuk MM, Dues DJ, Schaar CE, et al. Activation of DAF-16/FOXO by reactive oxygen  
618 species contributes to longevity in long-lived mitochondrial mutants in *Caenorhabditis*  
619 *elegans*. *PLoS Genet*. 2018;14(3):e1007268.
- 620 42. Firnhaber C, Hammarlund M. Neuron-specific feeding RNAi in *C. elegans* and its use in a  
621 screen for essential genes required for GABA neuron function. *PLoS Genet*.  
622 2013;9(11):e1003921.
- 623 43. Calixto A, Chelur D, Topalidou I, Chen X, Chalfie M. Enhanced neuronal RNAi in *C.*  
624 *elegans* using SID-1. *Nature methods*. 2010;7(7):554-559.
- 625 44. Ichishita R, Tanaka K, Sugiura Y, Sayano T, Mihara K, Oka T. An RNAi screen for  
626 mitochondrial proteins required to maintain the morphology of the organelle in  
627 *Caenorhabditis elegans*. *Journal of biochemistry*. 2008;143(4):449-454.
- 628 45. Huntington's Study Group. A novel gene containing a trinucleotide repeat that is  
629 expanded and unstable on Huntington's disease chromosomes. The Huntington's  
630 Disease Collaborative Research Group. *Cell*. 1993;72(6):971-983.



- 631 46. Banfi S, Servadio A, Chung MY, et al. Identification and characterization of the gene  
632 causing type 1 spinocerebellar ataxia. *Nature genetics*. 1994;7(4):513-520.
- 633 47. Slow EJ, van Raamsdonk J, Rogers D, et al. Selective striatal neuronal loss in a YAC128  
634 mouse model of Huntington disease. *Human molecular genetics*. 2003;12(13):1555-  
635 1567.
- 636 48. Mangiarini L, Sathasivam K, Seller M, et al. Exon 1 of the HD gene with an expanded CAG  
637 repeat is sufficient to cause a progressive neurological phenotype in transgenic mice.  
638 *Cell*. 1996;87(3):493-506.
- 639 49. Morley JF, Brignull HR, Weyers JJ, Morimoto RI. The threshold for polyglutamine-  
640 expansion protein aggregation and cellular toxicity is dynamic and influenced by aging in  
641 *Caenorhabditis elegans*. *Proc Natl Acad Sci U S A*. 2002;99(16):10417-10422.
- 642 50. Wang H, Lim PJ, Yin C, Rieckher M, Vogel BE, Monteiro MJ. Suppression of  
643 polyglutamine-induced toxicity in cell and animal models of Huntington's disease by  
644 ubiquilin. *Hum Mol Genet*. 2006;15(6):1025-1041.
- 645 51. Parker JA, Connolly JB, Wellington C, Hayden M, Dausset J, Neri C. Expanded  
646 polyglutamines in *Caenorhabditis elegans* cause axonal abnormalities and severe  
647 dysfunction of PLM mechanosensory neurons without cell death. *Proc Natl Acad Sci U S*  
648 *A*. 2001;98(23):13318-13323.
- 649 52. Nollen EA, Garcia SM, van Haften G, et al. Genome-wide RNA interference screen  
650 identifies previously undescribed regulators of polyglutamine aggregation. *Proc Natl*  
651 *Acad Sci U S A*. 2004;101(17):6403-6408.
- 652 53. Lejeune FX, Mesrob L, Parmentier F, et al. Large-scale functional RNAi screen in *C.*  
653 *elegans* identifies genes that regulate the dysfunction of mutant polyglutamine neurons.  
654 *BMC genomics*. 2012;13:91.
- 655 54. Salin K, Auer SK, Rey B, Selman C, Metcalfe NB. Variation in the link between oxygen  
656 consumption and ATP production, and its relevance for animal performance. *Proc Biol*  
657 *Sci*. 2015;282(1812):20151028.
- 658 55. Bratic I, Trifunovic A. Mitochondrial energy metabolism and ageing. *Biochimica et*  
659 *biophysica acta*. 2010;1797(6-7):961-967.
- 660 56. Lemire BD, Behrendt M, DeCorby A, Gaskova D. *C. elegans* longevity pathways converge  
661 to decrease mitochondrial membrane potential. *Mech Ageing Dev*. 2009;130(7):461-  
662 465.
- 663 57. Lincke CR, Broeks A, The I, Plasterk RH, Borst P. The expression of two P-glycoprotein  
664 (pgp) genes in transgenic *Caenorhabditis elegans* is confined to intestinal cells. *The*  
665 *EMBO journal*. 1993;12(4):1615-1620.
- 666 58. Mahajan-Miklos S, Tan MW, Rahme LG, Ausubel FM. Molecular mechanisms of bacterial  
667 virulence elucidated using a *Pseudomonas aeruginosa*-*Caenorhabditis elegans*  
668 pathogenesis model. *Cell*. 1999;96(1):47-56.
- 669 59. Broeks A, Janssen HW, Calafat J, Plasterk RH. A P-glycoprotein protects *Caenorhabditis*  
670 *elegans* against natural toxins. *The EMBO journal*. 1995;14(9):1858-1866.

671

672

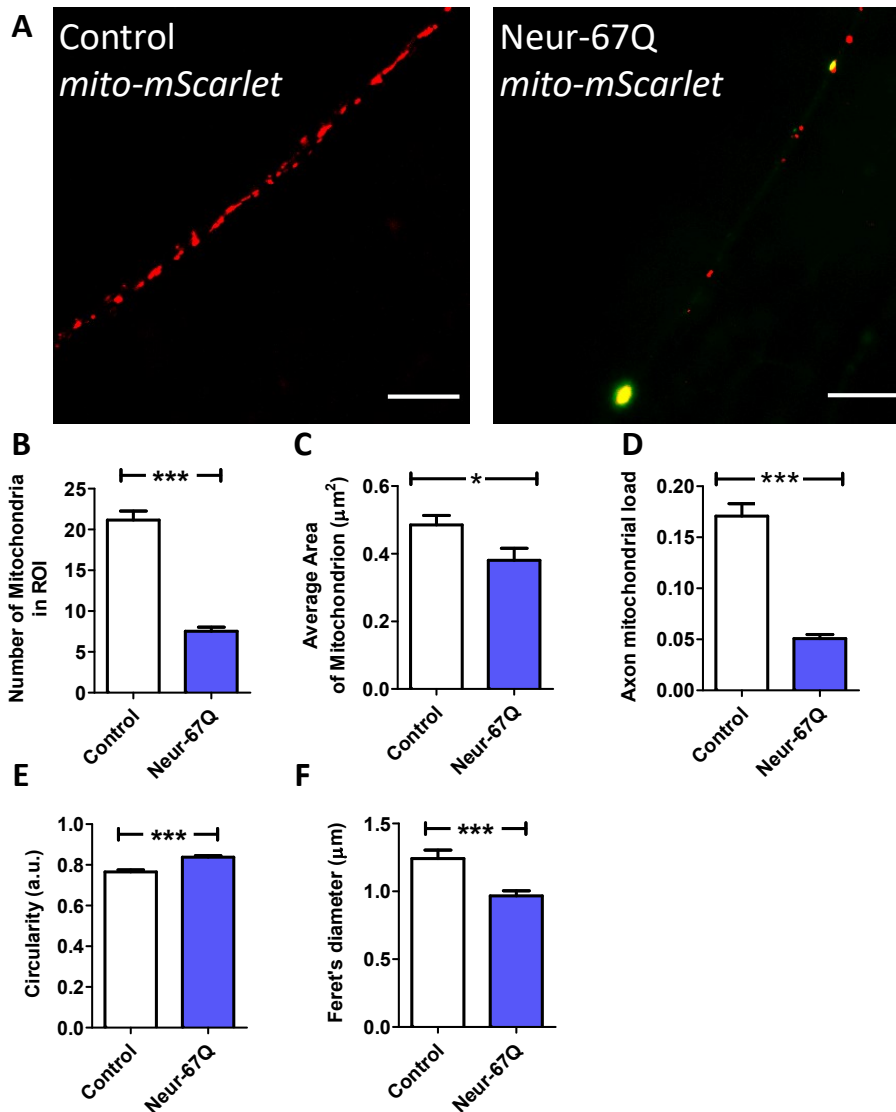

**Figure 1. CAG repeat expansion disrupts mitochondrial morphology in neurons.** Representative images of mitochondria (red) in dorsal nerve cord in control and Neur-67Q worms at day 7 of adulthood demonstrate that Neur-67Q worms exhibit mitochondrial fragmentation and decreased numbers of mitochondria in neurons (A). Mitochondrial morphology was visualized by fusing the red fluorescent protein mScarlet to the mitochondrially-targeted protein TOMM-20 in order to target mScarlet to the mitochondria. Quantification of mitochondrial morphology reveals that Neur-67Q worms have a significantly decreased number of mitochondria compared to control worms (B). Neur-67Q worms also exhibit decreased mitochondrial area (C), decreased axonal mitochondrial load (D), increased mitochondrial circularity (E) and a decreased mitochondrial Feret's diameter (F) compared to control worms. Control worms are *rab-3p::tommm-20::mScarlet*. Three biological replicates were performed. Statistical significance was assessed using a t-test. Error bar indicate SEM. \*p<0.05, \*\*\*p<0.001.

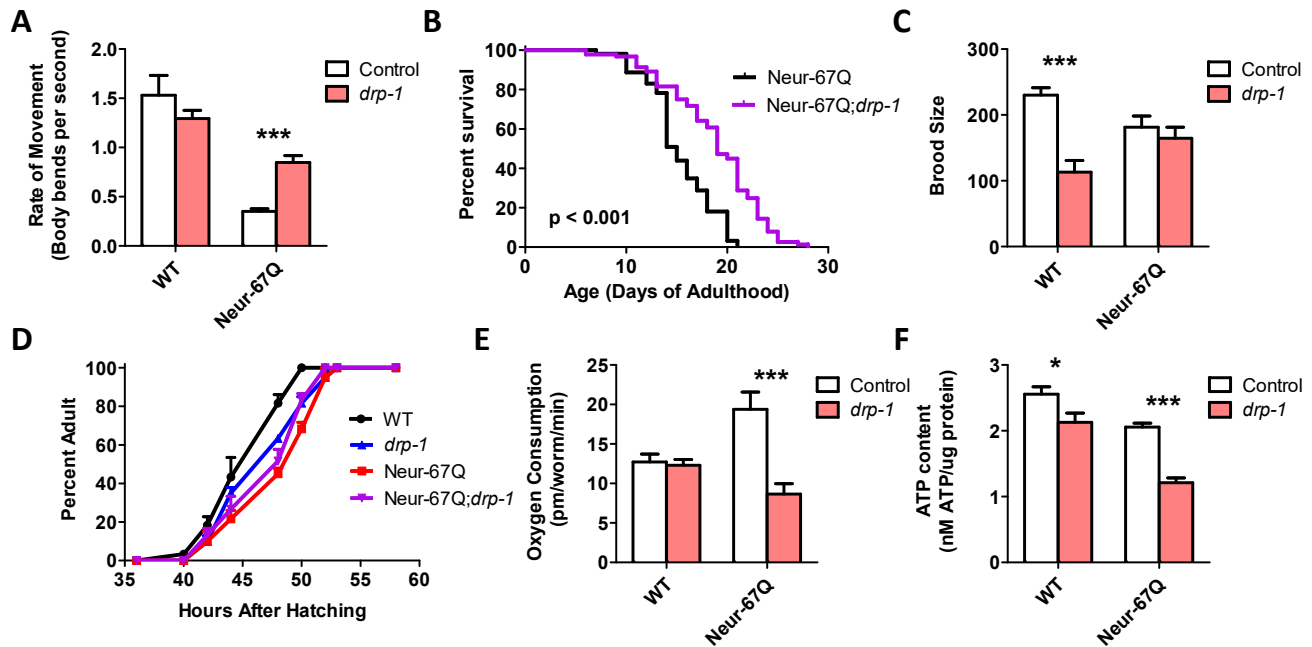

**Figure 2. Inhibition of mitochondrial fission is beneficial in a neuronal model of polyglutamine toxicity.** To examine the effect of disrupting mitochondrial fission in a neuronal model of polyglutamine toxicity, Neur-67Q worms were crossed to *drp-1* deletion mutants. Deletion of *drp-1* partially ameliorated phenotypic deficits in Neur-67Q worms. Neur-67Q;*drp-1* worms showed significantly increased movement (A) and lifespan (B) compared to Neur-67Q worms. Unlike wild-type worms, deletion of *drp-1* did not decrease fertility (C) or development time (D) in Neur-67Q worms. Combined this indicates that inhibiting mitochondrial fission is beneficial in a neuronal model of polyglutamine toxicity. Neur-67Q worms have increased oxygen consumption compared to wild-type worms, and a mutation in *drp-1* decreases oxygen consumption in these worms (E). Deletion of *drp-1* causes a decrease in ATP levels in both wild-type and Neur-67Q worms (F). Control data for wild-type and *drp-1* worms was previously published in Machiela et al., 2021 as experiments for both papers were performed simultaneously using the same controls. A minimum of three biological replicates were performed. Statistical significance was assessed using a two-way ANOVA with Bonferroni posttest (panels A,C,E,F), the log-rank test (panel B) or a repeated measures ANOVA (panel D). Error bars indicate SEM. \* $p < 0.05$ , \*\*\* $p < 0.001$ .

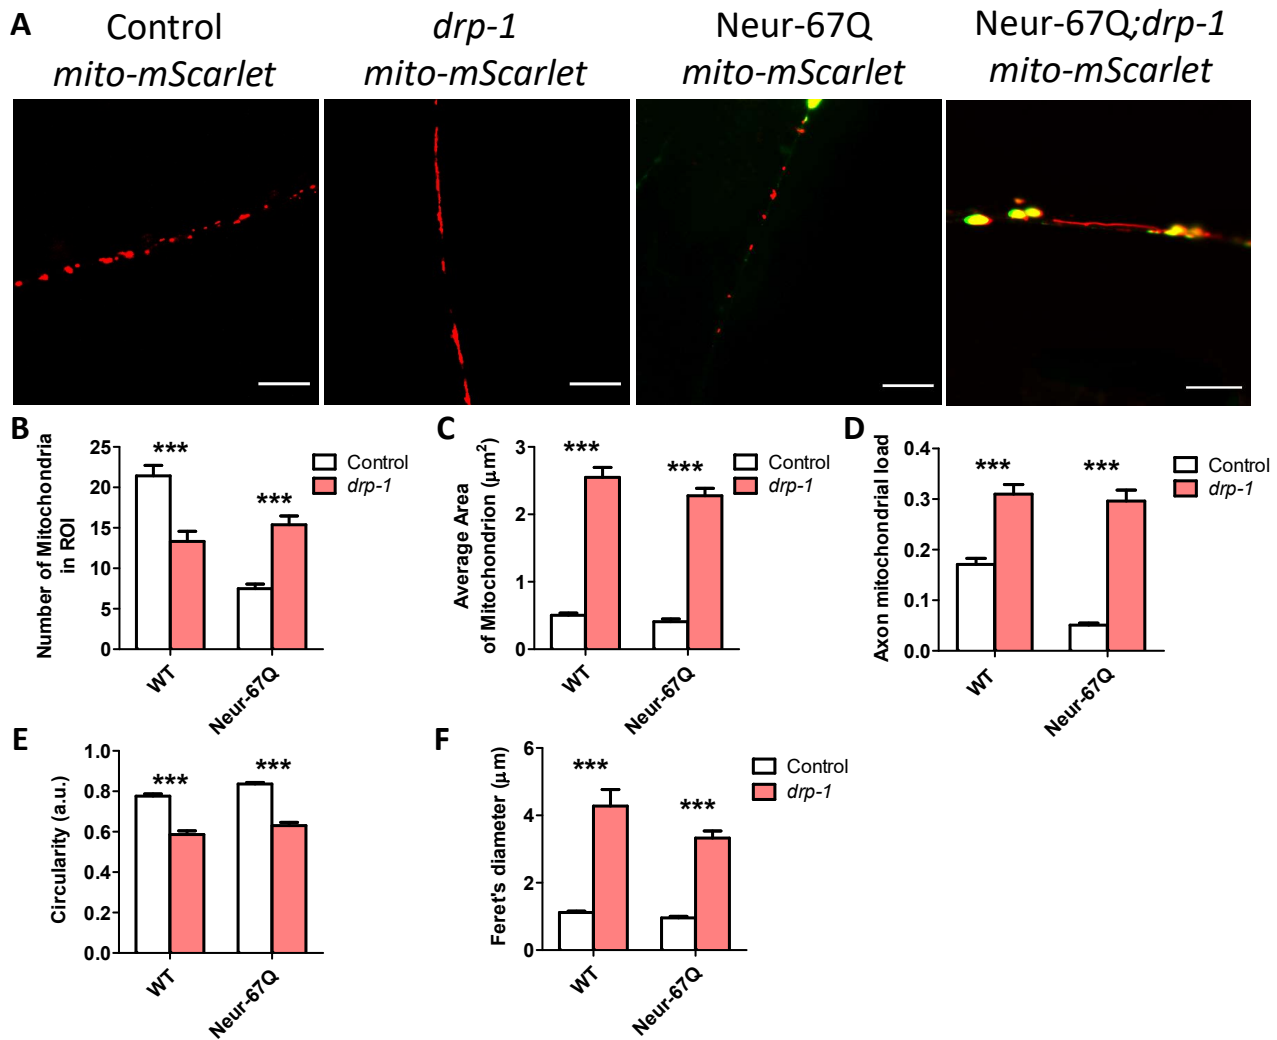

**Figure 3. Disruption of *drp-1* rescues deficits in mitochondrial morphology caused by CAG repeat expansion.** Deletion of *drp-1* decreased mitochondrial fragmentation in Neur-67Q and control worms at day 7 of adulthood. Representative images of Neur-67Q worms and control worms in wild-type and *drp-1* deletion background (A). Disruption of *drp-1* in Neur-67Q worms increased mitochondrial number (B), increased mitochondrial area (C), increased axonal mitochondrial load (D), decreased mitochondrial circularity (E), and increased the Feret's diameter of the mitochondria (F). Control worms are *rab-3p::tom-20::mScarlet*. Three biological replicates were performed. Statistical significance was assessed using a two-way ANOVA with Bonferroni posttest. Error bars indicate SEM. \*\*\* $p < 0.001$ .

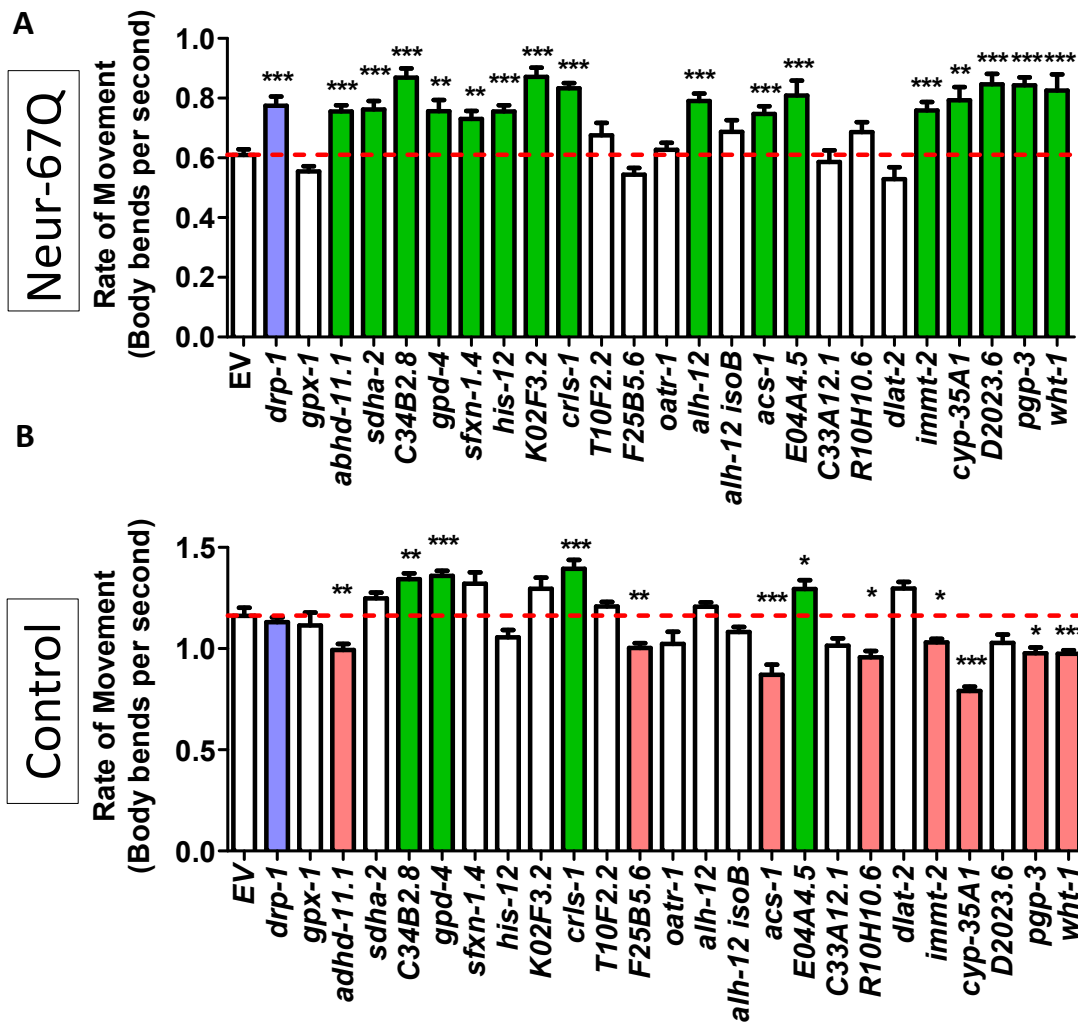

**Figure 4. Decreasing mitochondrial fragmentation improves rate of movement in a neuronal model of polyglutamine toxicity.** Neur-67Q worms in which RNAi is only effective in neurons (*Neur-67Q;sid-1;unc-119p::sid-1* worms) and a neuron-specific RNAi control strain (*sid-1;unc-119p::sid-1* worms) were treated with RNAi clones that decrease mitochondrial fragmentation. RNAi against 16 of the 24 genes tested improved the rate of movement in Neur-67Q worms (A). RNAi against four of these genes also increased movement in the neuron specific RNAi strain (B). Green indicates a significant increase in movement, while red indicates a significant decrease in movement. The positive control *drp-1* is indicated with blue. Three biological replicates were performed. Statistical significance was assessed using a one-way ANOVA with Dunnett's multiple comparison test. Error bars indicate SEM. \* $p < 0.05$ , \*\* $p < 0.01$ , \*\*\* $p < 0.001$ .

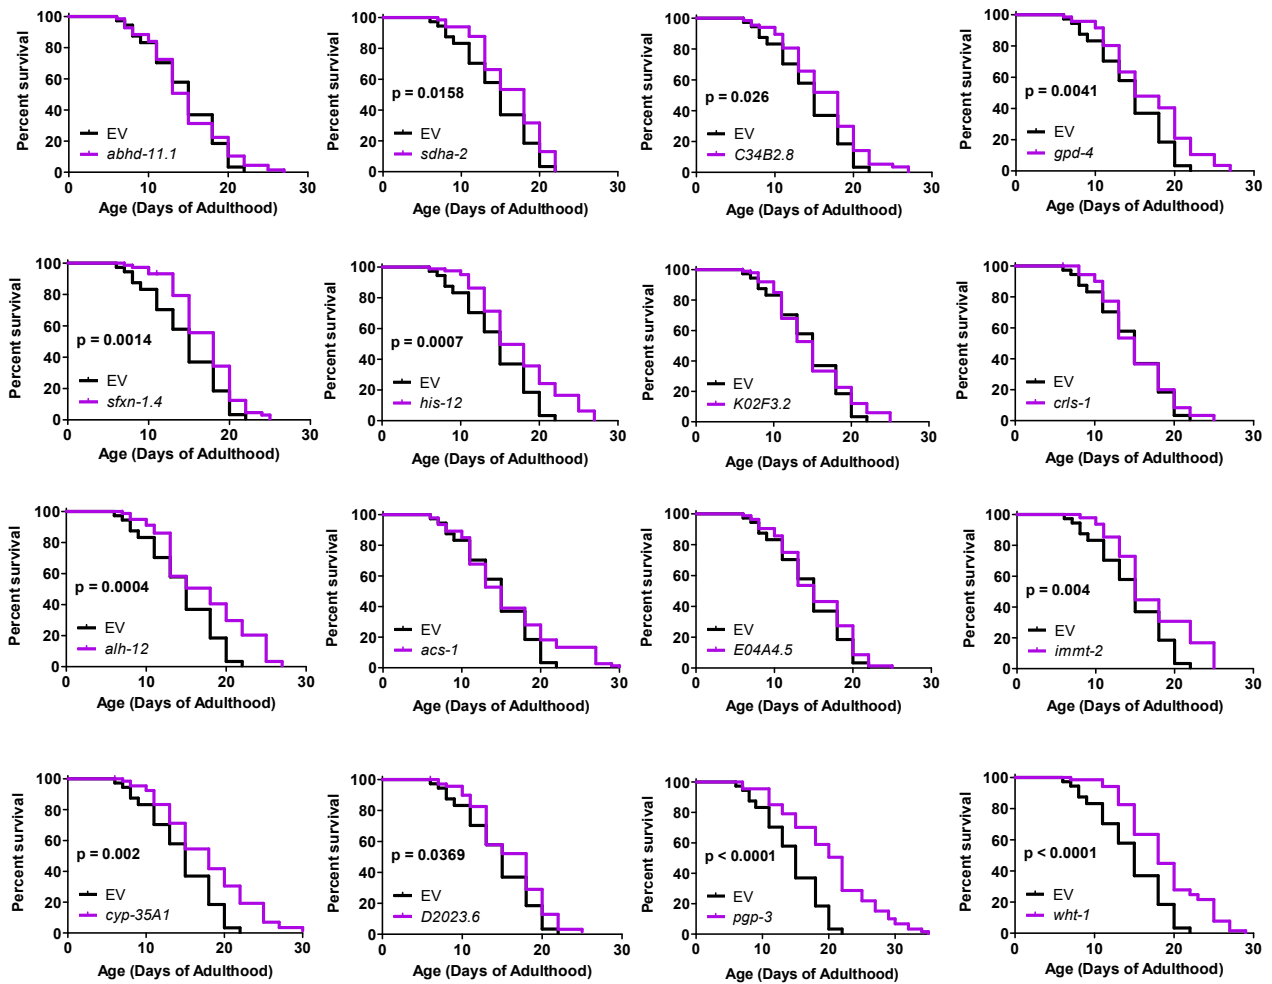

**Figure 5. RNAi clones previously shown to decrease mitochondrial fragmentation in body wall muscle rescue shortened lifespan in neuronal model of polyglutamine toxicity.** Neur-67Q worms in which RNAi is only effective in neurons (*Neur-67Q;sid-1;unc-119p::sid-1* worms) were treated with RNAi clones that decrease mitochondrial fragmentation and that we found to increase movement in Neur-67Q worms (Figure 4). Eleven of the sixteen RNAi clones that improved movement in Neur-67Q worms also resulted in increased lifespan. Three biological replicates were performed. Statistical significance was assessed using the log-rank test.

711 **Table 1. Effect of RNAi clones that decrease mitochondrial fragmentation in neuronal and body wall muscle models of polyglutamine toxicity.**  
 712 “ND” indicates not done. “=” indicates no change.

| Target gene         | <i>Drosophila</i> homolog | Mammalian homolog | Effect on thrashing in Neur-67Q worms | Effect on lifespan in Neur-67Q worms | Effect on crawling in BW-Htt74Q worms | Effect on thrashing in BW-Htt74Q worms | Effect on thrashing in neuron specific RNAi strain | Effect on lifespan in neuron specific RNAi strain | Effect of crawling in BW-Htt28Q worms | Effect of thrashing in BW-Htt28Q worms |
|---------------------|---------------------------|-------------------|---------------------------------------|--------------------------------------|---------------------------------------|----------------------------------------|----------------------------------------------------|---------------------------------------------------|---------------------------------------|----------------------------------------|
| <i>alh-12</i>       | <i>Aldh</i>               | <i>ALDH9A1</i>    | Increased                             | Increased                            | Increased                             | Increased                              | No effect                                          | Decreased                                         | No effect                             | Decreased                              |
| <i>pgp-3</i>        | <i>Mdr49</i>              | <i>ABCB4</i>      | Increased                             | Increased                            | Increased                             | Increased                              | Decreased                                          | Increased                                         | No effect                             | Decreased                              |
| <i>gpd-4</i>        | <i>Gapdh2</i>             | <i>GAPDH</i>      | Increased                             | Increased                            | Increased                             | No effect                              | Increased                                          | No effect                                         | No effect                             | Decreased                              |
| <i>immt-2</i>       | <i>Mitofilin</i>          | <i>IMMT</i>       | Increased                             | Increased                            | No effect                             | Increased                              | Decreased                                          | Increased                                         | No effect                             | No effect                              |
| <i>sdha-2</i>       | <i>SdhA</i>               | <i>SdhA</i>       | Increased                             | Increased                            | Increased                             | No effect                              | No effect                                          | Increased                                         | Increased                             | Decreased                              |
| <i>wht-1</i>        | <i>w</i>                  | <i>ABCG1</i>      | Increased                             | Increased                            | Increased                             | No effect                              | Decreased                                          | Decreased                                         | No effect                             | No effect                              |
| <i>C34B2.8</i>      | <i>ND-B16.6</i>           | <i>NDUFA13</i>    | Increased                             | Increased                            | Increased                             | Decreased                              | Increased                                          | No effect                                         | No effect                             | No effect                              |
| <i>drp-1</i>        | <i>Drp1</i>               | <i>DNM1L</i>      | Increased                             | Increased                            | No effect                             | No effect                              | No effect                                          | No effect                                         | No effect                             | No effect                              |
| <i>F25B5.6</i>      | <i>Fpgs</i>               | <i>FPGS</i>       | No effect                             | ND                                   | Increased                             | Increased                              | Decreased                                          | ND                                                | No effect                             | No effect                              |
| <i>his-12</i>       | <i>His2A</i>              | <i>HIS2H2AB</i>   | Increased                             | Increased                            | No effect                             | No effect                              | =                                                  | Decreased                                         | Decreased                             | Decreased                              |
| <i>sfxn-1.4</i>     | <i>Sfxn1-3</i>            | <i>SFXN1/3</i>    | Increased                             | Increased                            | No effect                             | No effect                              | =                                                  | Decreased                                         | No effect                             | No effect                              |
| <i>abhd-11.1</i>    | <i>CG2059</i>             | <i>ABHD11</i>     | Increased                             | =                                    | No effect                             | No effect                              | Decreased                                          | =                                                 | No effect                             | No effect                              |
| <i>acs-1</i>        | <i>Acsf2</i>              | <i>ACSF2</i>      | Increased                             | =                                    | No effect                             | No effect                              | Decreased                                          | =                                                 | Decreased                             | No effect                              |
| <i>crls-1</i>       | <i>CLS</i>                | <i>CRLS1</i>      | Increased                             | =                                    | No effect                             | No effect                              | Increased                                          | =                                                 | No effect                             | No effect                              |
| <i>cyp-35A1</i>     | <i>Cyp18a1</i>            | <i>CYP2C8</i>     | Increased                             | Increased                            | Decreased                             | No effect                              | Decreased                                          | =                                                 | No effect                             | No effect                              |
| <i>D2023.6</i>      | <i>Adck1</i>              | <i>ADCK1</i>      | Increased                             | Increased                            | Decreased                             | No effect                              | =                                                  | =                                                 | Decreased                             | No effect                              |
| <i>dlat-2</i>       | <i>muc</i>                | <i>DLAT</i>       | No effect                             | ND                                   | Increased                             | No effect                              | No effect                                          | ND                                                | Decreased                             | Decreased                              |
| <i>gpx-1</i>        | <i>PHGPx</i>              | <i>GPX4</i>       | No effect                             | ND                                   | No effect                             | Increased                              | No effect                                          | ND                                                | No effect                             | No effect                              |
| <i>timm-17B.1</i>   | <i>Tim17b</i>             | <i>TIMM17A/B</i>  | Increased                             | =                                    | No effect                             | No effect                              | Increased                                          | =                                                 | No effect                             | Decreased                              |
| <i>oatr-1</i>       | <i>Oat</i>                | <i>OAT</i>        | No effect                             | ND                                   | Increased                             | No effect                              | No effect                                          | ND                                                | Increased                             | No effect                              |
| <i>R10H10.6</i>     | <i>CG2846</i>             | <i>RFK</i>        | No effect                             | ND                                   | Increased                             | No effect                              | Decreased                                          | ND                                                | No effect                             | No effect                              |
| <i>alh-12 iso B</i> | <i>Aldh</i>               | <i>ALDH9A1</i>    | =                                     | ND                                   | Decreased                             | No effect                              | =                                                  | ND                                                | No effect                             | No effect                              |
| <i>C33A12.1</i>     | <i>ND-13B</i>             | <i>NDUFA5</i>     | =                                     | ND                                   | No effect                             | No effect                              | =                                                  | ND                                                | No effect                             | No effect                              |
| <i>K02F3.2</i>      | <i>aralar1</i>            | <i>SLC25A12</i>   | Increased                             | =                                    | Decreased                             | No effect                              | =                                                  | =                                                 | No effect                             | Decreased                              |
| <i>T10F2.2</i>      | <i>CG1628</i>             | <i>SLC25A15</i>   | =                                     | ND                                   | No effect                             | No effect                              | =                                                  | ND                                                | No effect                             | No effect                              |

713

Supplementary Information for:

## **Identification of novel therapeutic targets for polyglutamine toxicity disorders that target mitochondrial fragmentation**

Annika Traa<sup>1,2\*</sup>, Emily Machiela<sup>3\*</sup>, Paige D. Rudich<sup>1,2</sup>, Sonja K. Soo<sup>1,2</sup>, Megan M. Senchuk<sup>3</sup>, Jeremy M. Van Raamsdonk<sup>1,2,3,4,5</sup>

<sup>1</sup>Department of Neurology and Neurosurgery, McGill University, Montreal, Quebec, H4A 3J1, Canada

<sup>2</sup>Metabolic Disorders and Complications Program, and Brain Repair and Integrative Neuroscience Program, Research Institute of the McGill University Health Centre, Montreal, Quebec, H4A 3J1, Canada

<sup>3</sup>Laboratory of Aging and Neurodegenerative Disease, Center for Neurodegenerative Science, Van Andel Research Institute, Grand Rapids MI 49503, USA

<sup>4</sup>Division of Experimental Medicine, Department of Medicine, McGill University, Montreal, Quebec, Canada

<sup>5</sup>Department of Genetics, Harvard Medical School, Boston MA 02115, USA

\*these authors contributed equally to this work



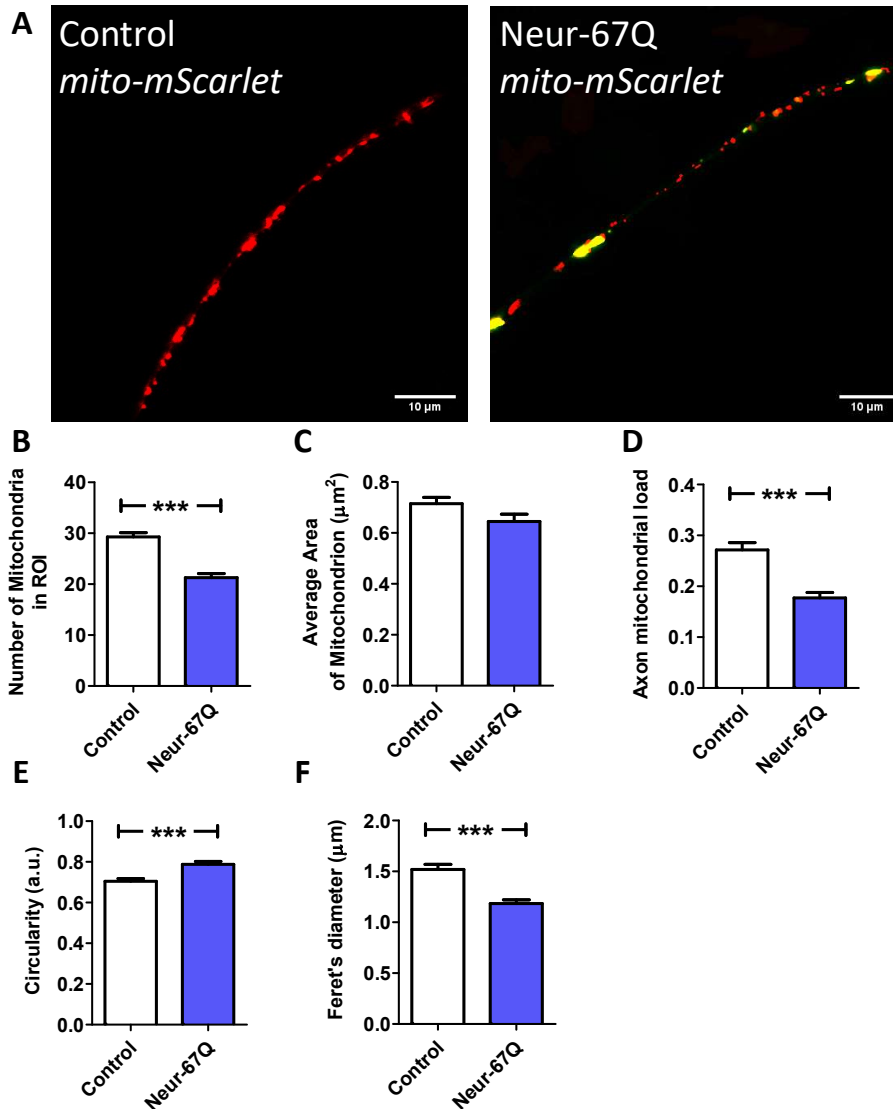

**Figure S1. CAG repeat expansion disrupts mitochondrial morphology in neurons during early adulthood.**

Representative images of mitochondria (red) in dorsal nerve cord in control and Neur-67Q worms (A). Mitochondrial morphology was visualized by fusing the red fluorescent protein mScarlet to the mitochondrially-targeted protein TOMM-20 in order to target mScarlet to the mitochondria. Quantification of mitochondrial morphology reveals that Neur-67Q worms have a decreased number of mitochondria compared to control worms (B). While mitochondrial area is not significantly affected in Neur-67Q worms (C), these worms have a significant decrease in axonal mitochondrial load (D) compared to control worms. The mitochondria of Neur-67Q worms have increased circularity (E) and a decreased Feret's diameter (F) compared to the mitochondria of control worms. Control worms are *rab-3p::tomm-20::mScarlet*. Three biological replicates were performed. Statistical significance was assessed using a t-test (panels B-F). Error bar indicate SEM. \*\*\* $p < 0.001$ .

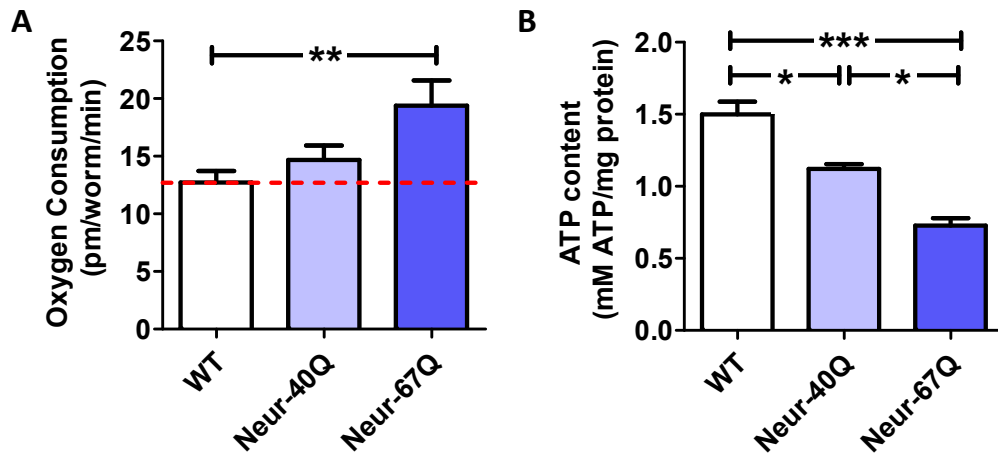

**Figure S2. CAG repeat expansion in neurons disrupts mitochondrial function.** Mitochondrial function in Neur-67Q worms was assessed by quantifying oxygen consumption and ATP levels. Neur-67Q worms have increased oxygen consumption (A) and decreased ATP levels (B) compared to control worms. Three biological replicates were performed. Statistical significance was assessed using a one-way ANOVA with Bonferroni's multiple comparison test. Error bar indicate SEM. \* $p < 0.05$ , \*\* $p < 0.01$ , \*\*\* $p < 0.001$ .

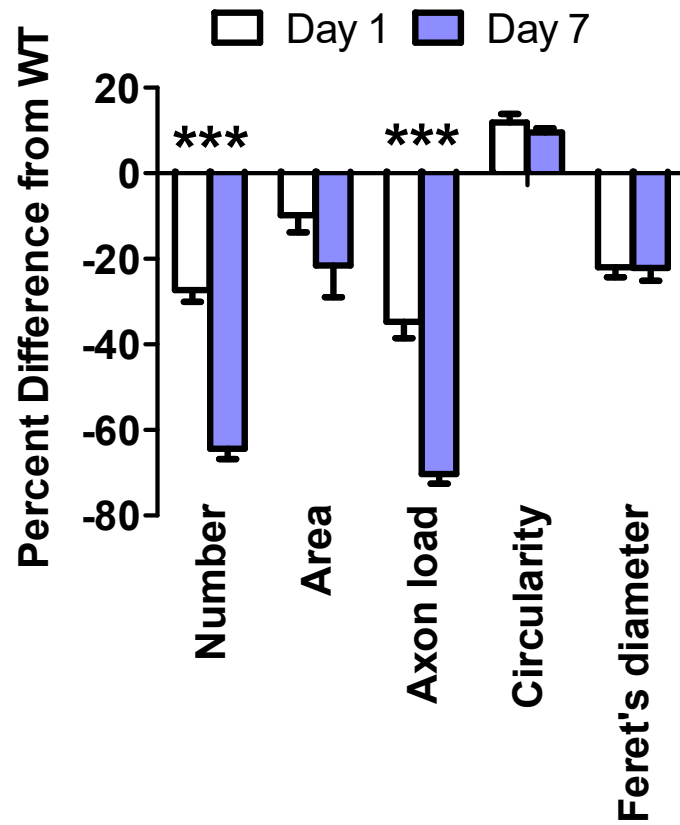

**Figure S3. Differences in mitochondrial morphology in neuronal model of polyglutamine toxicity worsen with age.** This figure compares the percentage change in measurements of mitochondrial morphology in Neur-67Q worms relative to wild-type worms at day 1 (Figure S1) and day 7 (Figure 1) of adulthood. The decrease in mitochondrial number and axonal mitochondrial load exhibited significantly greater deficit at day 7 of adulthood compared to day 1 of adulthood. Statistical significance was assessed using a two-way ANOVA with Bonferroni's multiple comparison test. Error bar indicate SEM. \*\*\* $p < 0.001$ .

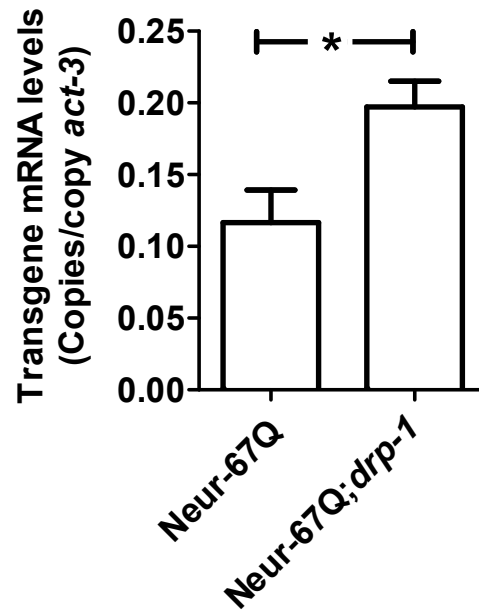

**Figure S4. Deletion of *drp-1* results in increased expression of the polyglutamine transgene.** mRNA was isolated from day 1 pre-fertile young adult worms. Primers were designed to target YFP. In Neur-67Q worms, deletion of *drp-1* significantly increased mRNA expression levels of the polyglutamine transgene. Bars indicate mean value of three biological replicates. Statistical significance was assessed using a t-test. Error bars indicate SEM. \* $p < 0.05$ .

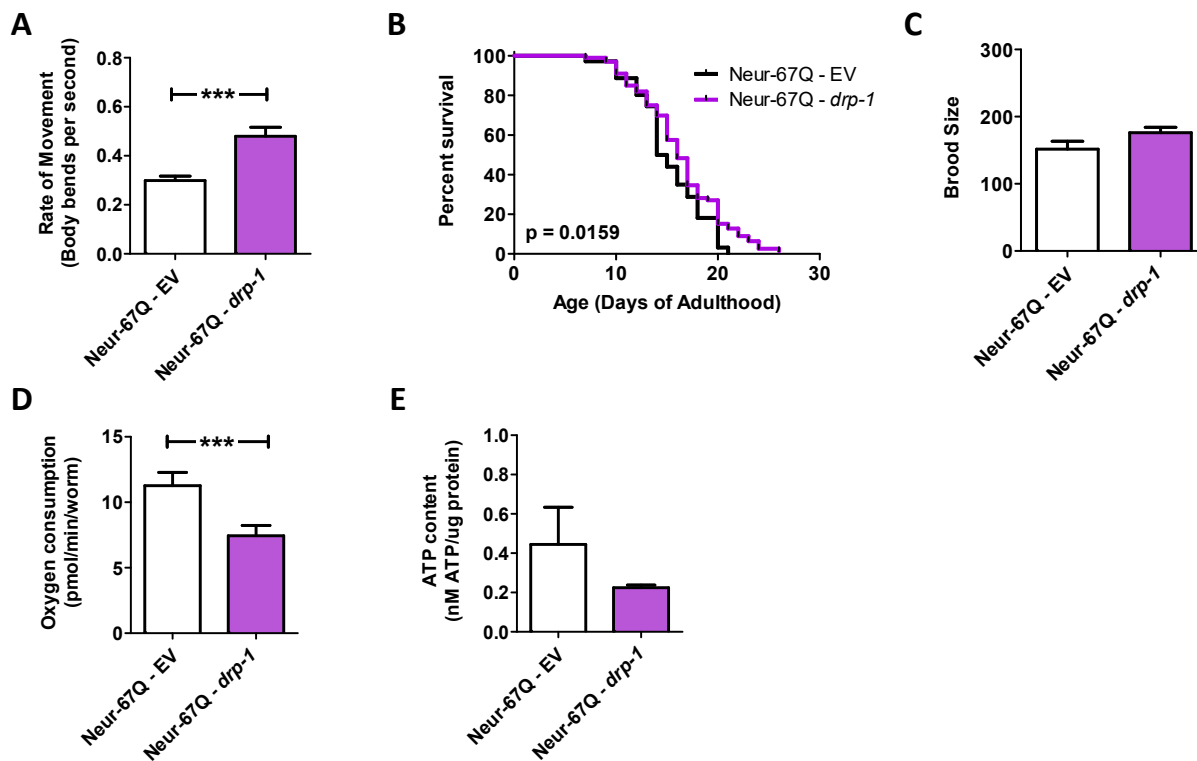

**Figure S5. Decreasing mitochondrial fission through *drp-1* RNAi increases movement and lifespan in neuronal models of polyglutamine toxicity.** Neur-67Q worms were crossed to *sid-1;unc-119p::sid-1* worms to allow for RNAi only in neurons. *drp-1* RNAi increases movement rates in Neur-67Q worms (A) and results in a small but significant increase in lifespan in Neur-67Q worms (B). *drp-1* RNAi has no effect on fertility in Neur-67Q worms (C). *drp-1* RNAi significantly reduced oxygen consumption in Neur-67Q worms (D) and resulted in a trend towards decreased ATP levels (E). A minimum of three biological replicates were performed. Bars indicate the mean value. Significance was assessed using a t-test (A,C,D,E) or log-rank test (B). Error bars indicate SEM. \*\*\* $p < 0.001$ .

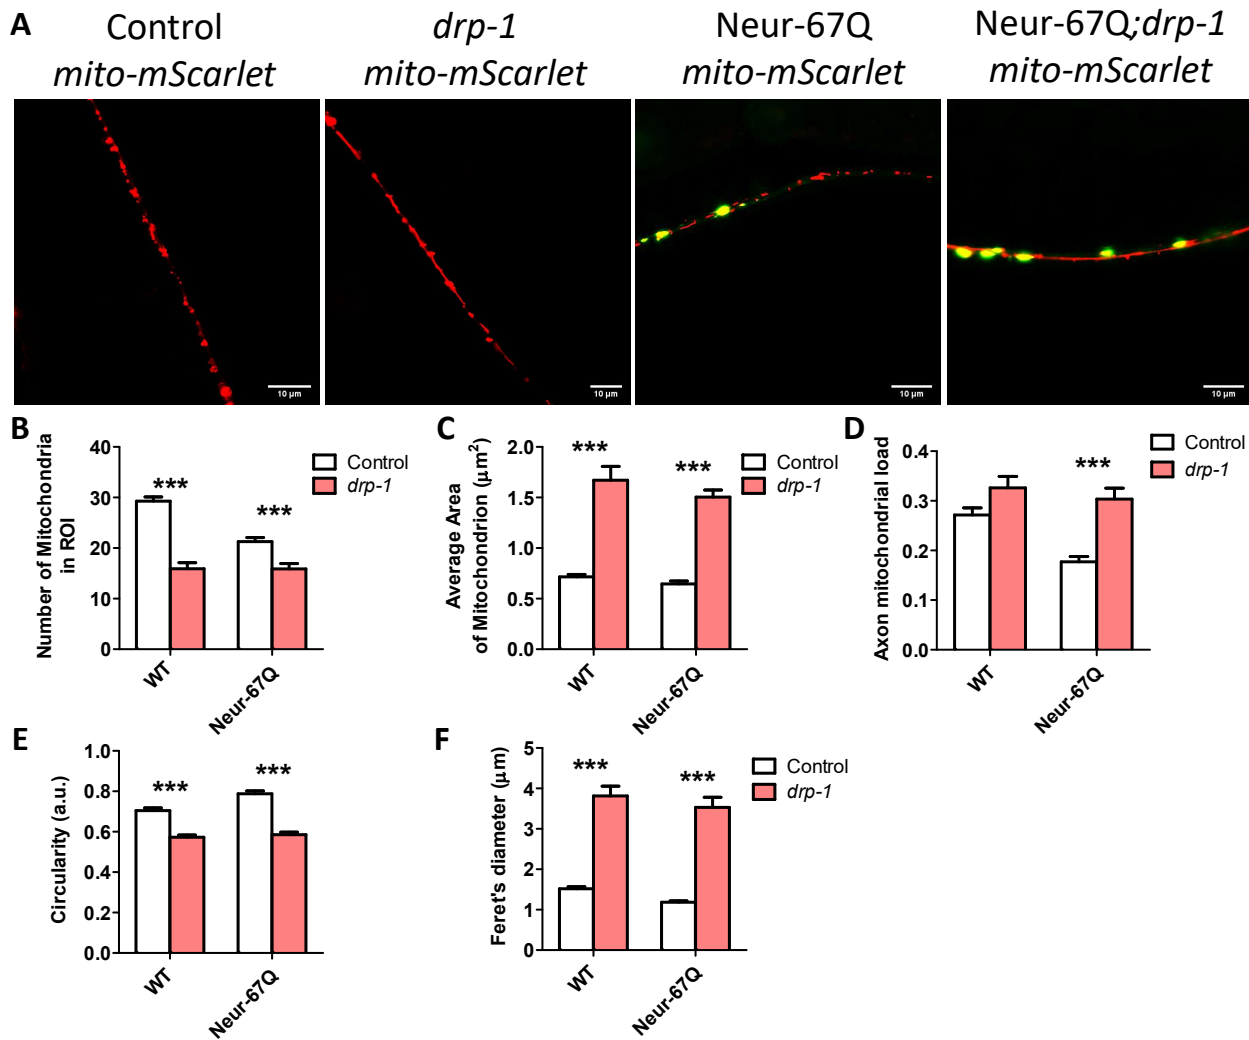

**Figure S6. Disruption of *drp-1* markedly elongates mitochondria in neurons.** Deletion of *drp-1* decreased mitochondrial fragmentation in Neur-67Q and control worms. Representative images of Neur-67Q worms and control worms in wild-type and *drp-1* deletion background (**A**). Quantification of mitochondrial morphology revealed that *drp-1* deletion significantly decreased mitochondrial number (**B**), increased mitochondrial area (**C**), increased axonal mitochondrial load (**D**), decreased mitochondrial circularity (**E**), and increased the Feret's diameter of the mitochondria (**F**) in both Neur-67Q and control worms. Control worms are *rab-3::tomm-20::mScarlet*. Three biological replicates were performed. Statistical significance was assessed using a two-way ANOVA with Bonferroni posttest. Error bars indicate SEM. \*\* $p < 0.01$ , \*\*\* $p < 0.001$ .

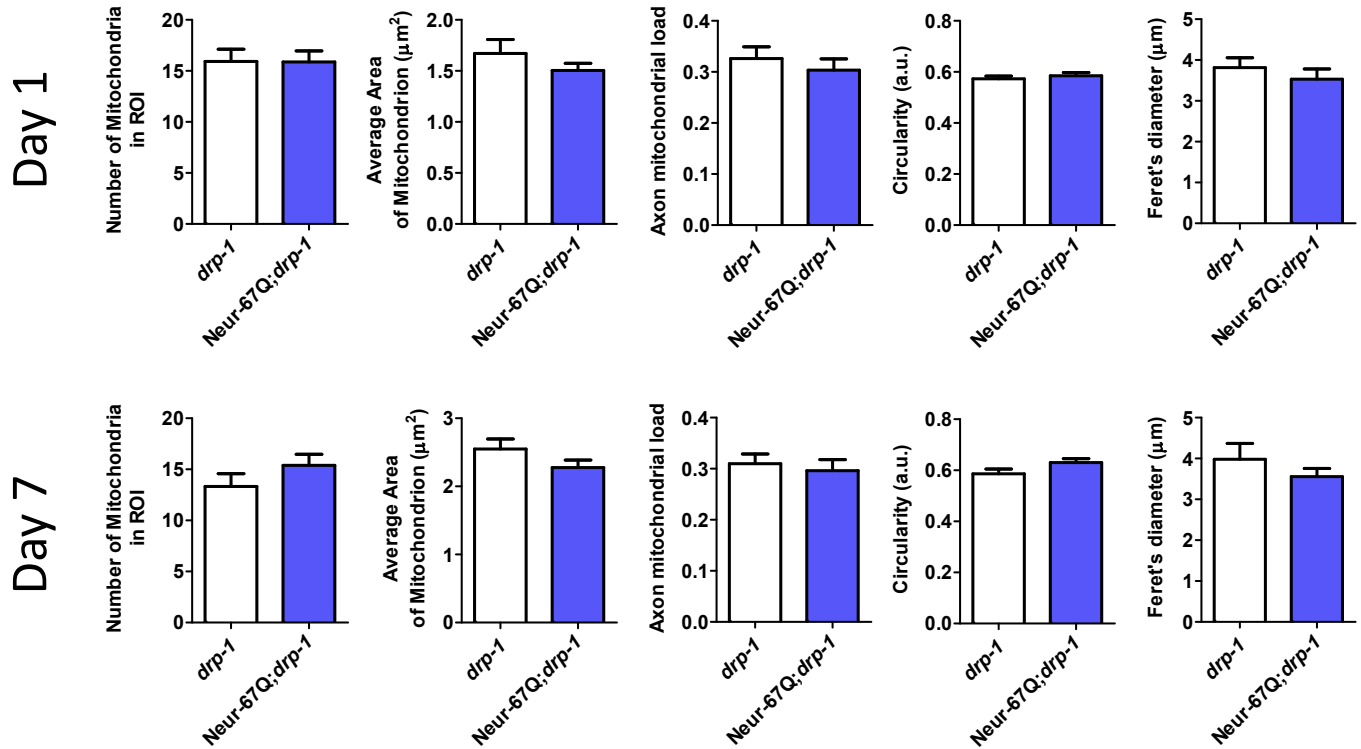

**Figure S7. Expression of disease-length polyglutamine in neurons does not affect mitochondrial morphology in *drp-1* mutant background.** This figure is displaying the data from **Figure 3** and **Figure S4** in such a way to directly compare *drp-1* worms to *Neur-67Q;drp-1* worms. There were no significant differences in any measure of mitochondrial morphology between *drp-1* and *Neur-67Q;drp-1* worms at day 1 (top) or day 7 (bottom) of adulthood. Thus, disruption of *drp-1* completely eliminates differences in mitochondrial morphology between *Neur-67Q* and wild-type worms. Three biological replicates were performed. Statistical significance was assessed using a t-test. Error bars indicate SEM.

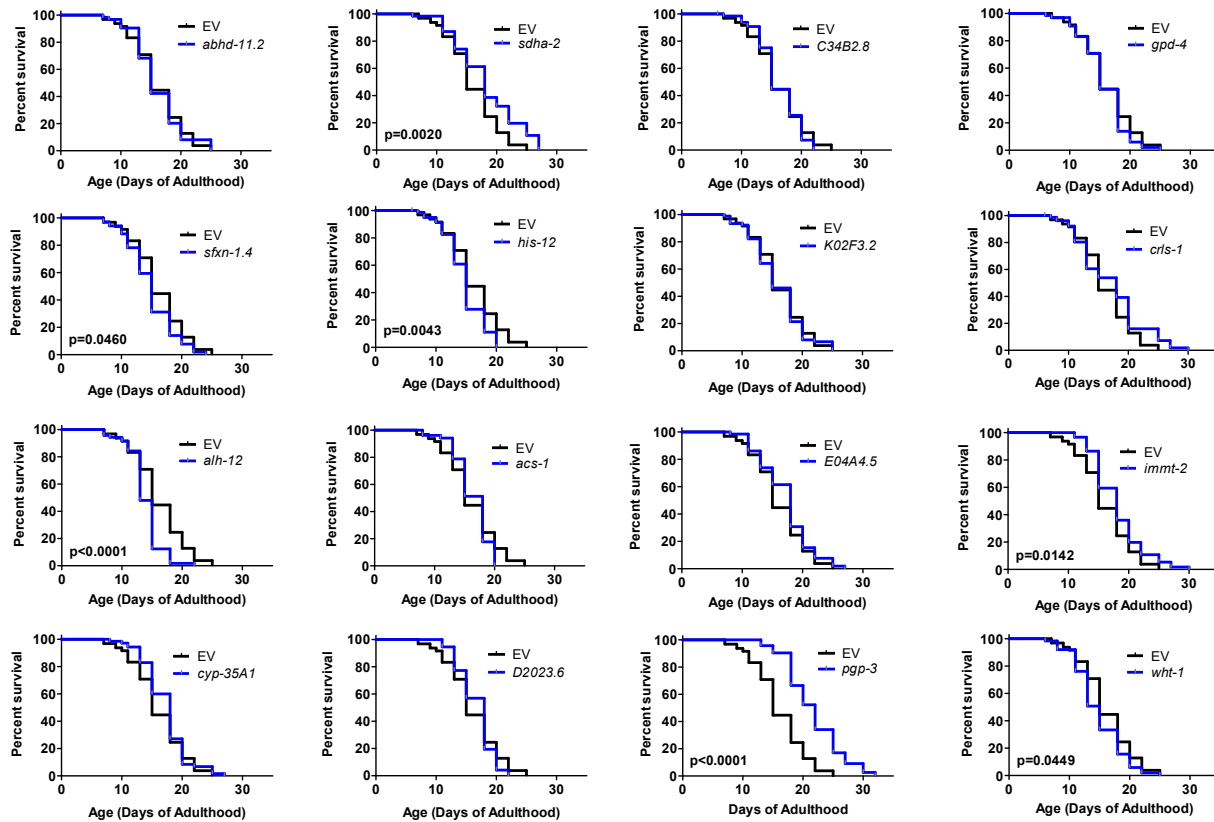

**Figure S8. Neuron-specific knockdown of *sdha-2*, *immt-2* and *pgp-3* extends lifespan in a wild-type background.** *unc-119p::sid-1;sid-1* control worms were treated with RNAi clones that decrease mitochondrial fragmentation and improved movement in Neur-67Q worms. Only three of the sixteen RNAi clones that improved movement in Neur-67Q worms resulted in increased lifespan in control worms. Three biological replicates were performed. Log-rank test was used to assess significance.



714 **Table S1. Comparison of neuronal and body wall muscle models of polyglutamine toxicity.**

|                                        | <b>Wild-type</b> | <b>Neur-67Q model</b> | <b>BW-Htt74Q model</b> |
|----------------------------------------|------------------|-----------------------|------------------------|
| Promoter                               |                  | <i>rgef-1</i>         | <i>unc-54</i>          |
| Huntingtin sequence                    |                  | None                  | Exon 1                 |
| Glutamines                             |                  | 67                    | 74                     |
| Fluorescent tag                        |                  | YFP                   | GFP                    |
| Expression                             |                  | All neurons           | Body wall muscle       |
| Mitochondrial number                   |                  | Decreased             | Increased              |
| Mitochondrial area                     |                  | Unchanged             | Decreased              |
| Mitochondria circularity               |                  | Increased             | Increased              |
| Oxygen consumption                     |                  | Increased             | Unchanged              |
| ATP levels                             |                  | Decreased             | Unchanged              |
| Movement                               |                  | Decreased             | Decreased              |
| Lifespan                               |                  | Decreased             | Decreased              |
| Brood size                             |                  | Decreased             | Decreased              |
| Development time                       |                  | Increased             | Unchanged              |
| <b>Effect of <i>drp-1</i> deletion</b> |                  |                       |                        |
| Mitochondrial morphology               | Elongated        | Elongated             | Unchanged              |
| Oxygen consumption                     | Unchanged        | Decreased             | Unchanged              |
| ATP levels                             | Decreased        | Decreased             | Decreased              |
| Movement                               | Unchanged        | Increased             | Decreased              |
| Lifespan                               | Unchanged        | Increased             | Decreased              |
| Brood size                             | Decreased        | Unchanged             | Decreased              |
| Development time                       | Increased        | Unchanged             | Increased              |
| <b>Effect of <i>drp-1</i> RNAi</b>     |                  |                       |                        |
| Oxygen consumption                     | Unchanged        | Decreased             | Unchanged              |
| ATP levels                             | Decreased        | Decreased             | Decreased              |
| Movement                               | Increased        | Increased             | Unchanged              |
| Lifespan                               | Unchanged        | Increased             | Increased              |
| Brood size                             | Decreased        | Unchanged             | Decreased              |

715

716
